# Supplementary material for: Fluorination effects probed in 4-fluoroacetophenone and its monohydrate
Source: Royal Society of Chemistry journal article supplement (doi:10.1039/d3cp01578e), 2023-01-01
Supplement: d3cp01578e1.pdf [file d3cp01578e1.pdf]

## Electronic Supplementary Information

# Fluorination Effects Probed in 4-fluoroacetophenone and Its Monohydrate

Xiujuan Wang,<sup>a</sup> Jiayi Li,<sup>a</sup> Juncheng Lei,<sup>a</sup> Xuefang Xu,<sup>\*a</sup> Yang Zheng,<sup>a</sup> Junhua Chen,<sup>\*b</sup> Xiao  
Tian,<sup>a</sup> and Qian Gou<sup>\*a,c</sup>

<sup>a</sup> *School of Chemistry and Chemical Engineering, Chongqing University, Daxuecheng South Rd. 55,  
401331, Chongqing, China.*

<sup>b</sup> *School of Pharmacy, Guizhou Medical University, Guiyang 550025, Guizhou, China*

<sup>c</sup> *Chongqing Key Laboratory of Theoretical and Computational Chemistry, Daxuecheng South Rd. 55,  
401331, Chongqing, China.*

### Corresponding Author

\*Qian Gou, E-mail: [qian.gou@cqu.edu.cn](mailto:qian.gou@cqu.edu.cn);

\*Xuefang Xu, E-mail: [xuefang\\_xu@cqu.edu.cn](mailto:xuefang_xu@cqu.edu.cn);

\*Junhua Chen, E-mail: [chenjh@gmc.edu.cn](mailto:chenjh@gmc.edu.cn).

## **Contents:**

**Fig. S1:** Structure, principal axes of inertia and heavy atomic labels of the 4FAP monomer optimized at the MP2/6-311++G(d,p) level of theory.

**Table S1:** Experimental transition frequencies ( $\nu_{\text{obs}}$ , MHz) and fit deviations ( $\nu_{\text{obs-calc}}$ , kHz) of 4FAP.

**Table S2:** Experimental transition frequencies ( $\nu_{\text{obs}}$ , MHz) and fit deviations ( $\nu_{\text{obs-calc}}$ , kHz) of  $^{13}\text{C}1$  isotopologue of 4FAP.

**Table S3:** Experimental transition frequencies ( $\nu_{\text{obs}}$ , MHz) and fit deviations ( $\nu_{\text{obs-calc}}$ , kHz) of  $^{13}\text{C}2$  isotopologue of 4FAP.

**Table S4:** Experimental transition frequencies ( $\nu_{\text{obs}}$ , MHz) and fit deviations ( $\nu_{\text{obs-calc}}$ , kHz) of  $^{13}\text{C}3$  isotopologue of 4FAP.

**Table S5:** Experimental transition frequencies ( $\nu_{\text{obs}}$ , MHz) and fit deviations ( $\nu_{\text{obs-calc}}$ , kHz) of  $^{13}\text{C}4$  isotopologue of 4FAP.

**Table S6:** Experimental transition frequencies ( $\nu_{\text{obs}}$ , MHz) and fit deviations ( $\nu_{\text{obs-calc}}$ , kHz) of  $^{13}\text{C}5$  isotopologue of 4FAP.

**Table S7:** Experimental transition frequencies ( $\nu_{\text{obs}}$ , MHz) and fit deviations ( $\nu_{\text{obs-calc}}$ , kHz) of  $^{13}\text{C}6$  isotopologue of 4FAP.

**Table S8:** Experimental transition frequencies ( $\nu_{\text{obs}}$ , MHz) and fit deviations ( $\nu_{\text{obs-calc}}$ , kHz) of  $^{13}\text{C}7$  isotopologue of 4FAP.

**Table S9:** Experimental transition frequencies ( $\nu_{\text{obs}}$ , MHz) and fit deviations ( $\nu_{\text{obs-calc}}$ , kHz) of  $^{13}\text{C}8$  isotopologue of 4FAP.

**Table S10:** Comparison of the *ab initio* ( $r_e$ ), the substituted ( $r_s$ ) and the semi-experimental equilibrium ( $r_{s \rightarrow e}^{\text{SE}}$ ) coordinates of carbon atoms in 4FAP.

**Table S11:** Theoretical, experimental and semi-experimental rotational constants of all nine isotopologues of 4FAP.

**Table S12:** Theoretical, experimental and semi-experimental rotational constants of all nine isotopologues of AP.

**Table S13:** Geometries of the carbon skeletons of the 4FAP and AP. ( $r_e$ ,  $r_s$  and  $r_{s \rightarrow e}^{\text{SE}}$  structures)

**Table S14:** Experimental transition frequencies ( $\nu_{\text{obs}}$ , MHz) and fit deviations ( $\nu_{\text{obs-calc}}$ , kHz) of the isomer I of 4FAP-H<sub>2</sub>O.

**Table S15:** Experimental transition frequencies ( $\nu_{\text{obs}}$ , MHz) and fit deviations ( $\nu_{\text{obs-calc}}$ , kHz) of the Isomer I of 4FAP-H<sub>2</sub><sup>18</sup>O.

**Table S16:** Experimental transition frequencies ( $\nu_{\text{obs}}$ , MHz) and fit deviations ( $\nu_{\text{obs-calc}}$ , kHz) of the Isomer I of 4FAP-HOD.

**Table S17:** Experimental transition frequencies ( $\nu_{\text{obs}}$ , MHz) and fit deviations ( $\nu_{\text{obs-calc}}$ , kHz) of the Isomer I of 4FAP-DOH.

**Table S18:** Experimental transition frequencies ( $\nu_{\text{obs}}$ , MHz) and fit deviations ( $\nu_{\text{obs-calc}}$ , kHz) of the Isomer I of 4FAP-D<sub>2</sub>O.

**Table S19:** Experimental transition frequencies ( $\nu_{\text{obs}}$ , MHz) and fit deviations ( $\nu_{\text{obs-calc}}$ , kHz) of the Isomer II of 4FAP-H<sub>2</sub>O.

**Table S20:** Experimental transition frequencies ( $\nu_{\text{obs}}$ , MHz) and fit deviations ( $\nu_{\text{obs-calc}}$ , kHz) of the Isomer II of 4FAP-H<sub>2</sub><sup>18</sup>O.

**Table S21:** Experimental transition frequencies ( $\nu_{\text{obs}}$ , MHz) and fit deviations ( $\nu_{\text{obs-calc}}$ , kHz) of the Isomer II of 4FAP-HOD.

**Table S22:** Experimental transition frequencies ( $\nu_{\text{obs}}$ , MHz) and fit deviations ( $\nu_{\text{obs-calc}}$ , kHz) of the

Isomer II of 4FAP-DOH.

**Table S23:** Experimental transition frequencies ( $\nu_{\text{obs}}$ , MHz) and fit deviations ( $\nu_{\text{obs-calc}}$ , kHz) of the Isomer II of 4FAP-D<sub>2</sub>O.

**Fig. S2:** The structural comparison of 4FAP and isomer II of 4FAP-H<sub>2</sub>O in the distance (Å) between the H atoms of -CH<sub>3</sub> and the O atoms of -C=O.

**Table S24:** Transition frequencies and intensities of isomer I and isomer II of the 4FAP-H<sub>2</sub>O complex for the population ratio.

**Table S25:** The  $r_s$  and  $r_e$  coordinates of the oxygen atom of water in 4FAP-H<sub>2</sub>O.

**Table S26:** Theoretical, experimental and semi-experimental rotational constants of H<sub>2</sub><sup>18</sup>O, DOH (with D participating in the HB), HOD, and D<sub>2</sub>O isotopologues of isomers I of the 4FAP-H<sub>2</sub>O.

**Table S27:** Theoretical, experimental and semi-experimental rotational constants of H<sub>2</sub><sup>18</sup>O, DOH (with D participating in the HB), HOD, and D<sub>2</sub>O isotopologues of isomers II of the 4FAP-H<sub>2</sub>O.

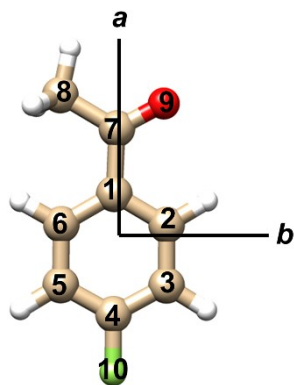

**Fig. S1.** Structure, principal axes of inertia and heavy atomic labels of the 4FAP monomer optimized at the MP2/6-311++G(d,p) level of theory.

**Table S1** Experimental transition frequencies ( $\nu_{\text{obs}}$ , MHz) and fit deviations ( $\nu_{\text{obs-calc}}$ , kHz) of 4FAP.

| $J'$ | $K_a'$ | $K_c'$ | $J''$ | $K_a''$ | $K_c''$ | State | $\nu_{\text{obs}}$ /MHz | $\nu_{\text{obs-calc}}$ /kHz |
|------|--------|--------|-------|---------|---------|-------|-------------------------|------------------------------|
| 4    | 0      | 4      | 3     | 0       | 3       | A     | 5613.2017               | -2.1                         |
| 4    | 0      | 4      | 3     | 0       | 3       | E     | 5613.2017               | 1.5                          |
| 4    | 1      | 4      | 3     | 1       | 3       | A     | 5385.3023               | -0.8                         |
| 4    | 1      | 4      | 3     | 1       | 3       | E     | 5385.3023               | 1.1                          |
| 4    | 1      | 3      | 3     | 1       | 2       | A     | 5910.3442               | 3.0                          |
| 4    | 1      | 3      | 3     | 1       | 2       | E     | 5910.3376               | 2.6                          |
| 4    | 2      | 3      | 3     | 2       | 2       | A     | 5653.1607               | -0.3                         |
| 4    | 2      | 3      | 3     | 2       | 2       | E     | 5653.1888               | 1.1                          |
| 4    | 2      | 2      | 3     | 2       | 1       | A     | 5696.5106               | -1.1                         |
| 4    | 2      | 2      | 3     | 2       | 1       | E     | 5696.4782               | 1.8                          |
| 4    | 3      | 2      | 3     | 3       | 1       | A     | 5665.0171               | -1.3                         |
| 4    | 3      | 2      | 3     | 3       | 1       | E     | 5665.2578               | 3.6                          |
| 4    | 3      | 1      | 3     | 3       | 0       | A     | 5665.5620               | 0.1                          |
| 4    | 3      | 1      | 3     | 3       | 0       | E     | 5665.3187               | 1.0                          |
| 5    | 0      | 5      | 4     | 0       | 4       | A     | 6984.8343               | -0.5                         |
| 5    | 0      | 5      | 4     | 0       | 4       | E     | 6984.8343               | 3.7                          |
| 5    | 1      | 5      | 4     | 1       | 4       | A     | 6724.0404               | -1.4                         |
| 5    | 1      | 5      | 4     | 1       | 4       | E     | 6724.0404               | 0.9                          |
| 5    | 1      | 4      | 4     | 1       | 3       | A     | 7379.1204               | 1.8                          |
| 5    | 1      | 4      | 4     | 1       | 3       | E     | 7379.1099               | -1.2                         |
| 5    | 2      | 4      | 4     | 2       | 3       | A     | 7060.9999               | 3.6                          |
| 5    | 2      | 4      | 4     | 2       | 3       | E     | 7060.9999               | -0.2                         |
| 5    | 2      | 3      | 4     | 2       | 2       | A     | 7146.8426               | 0.5                          |
| 5    | 2      | 3      | 4     | 2       | 2       | E     | 7146.8264               | -0.8                         |
| 5    | 3      | 3      | 4     | 3       | 2       | A     | 7084.7637               | 0.7                          |
| 5    | 3      | 3      | 4     | 3       | 2       | E     | 7085.2789               | -0.6                         |
| 5    | 3      | 2      | 4     | 3       | 1       | A     | 7086.6609               | -1.5                         |
| 5    | 3      | 2      | 4     | 3       | 1       | E     | 7086.1363               | 1.0                          |
| 5    | 4      | 2      | 4     | 4       | 1       | A     | 7080.3892               | -0.7                         |
| 5    | 4      | 2      | 4     | 4       | 1       | E     | 7080.3892               | -2.3                         |
| 5    | 4      | 1      | 4     | 4       | 0       | A     | 7080.4067               | 4.3                          |
| 5    | 4      | 1      | 4     | 4       | 0       | E     | 7080.3892               | -1.1                         |
| 6    | 0      | 6      | 5     | 0       | 5       | A     | 8337.1386               | -2.8                         |
| 6    | 0      | 6      | 5     | 0       | 5       | E     | 8337.1386               | 1.7                          |
| 6    | 1      | 6      | 5     | 1       | 5       | A     | 8058.1936               | -1.2                         |
| 6    | 1      | 6      | 5     | 1       | 5       | E     | 8058.1936               | 1.5                          |
| 6    | 1      | 5      | 5     | 1       | 4       | A     | 8841.5153               | 1.7                          |
| 6    | 1      | 5      | 5     | 1       | 4       | E     | 8841.5037               | -1.0                         |
| 6    | 2      | 5      | 5     | 2       | 4       | A     | 8465.2047               | -1.3                         |
| 6    | 2      | 5      | 5     | 2       | 4       | E     | 8465.2047               | 1.3                          |
| 6    | 2      | 4      | 5     | 2       | 3       | A     | 8612.8391               | 1.9                          |
| 6    | 2      | 4      | 5     | 2       | 3       | E     | 8612.8234               | -2.8                         |

---

|   |   |   |   |   |   |   |            |      |
|---|---|---|---|---|---|---|------------|------|
| 6 | 3 | 4 | 5 | 3 | 3 | A | 8506.3617  | -0.2 |
| 6 | 3 | 4 | 5 | 3 | 3 | E | 8506.7696  | 0.4  |
| 6 | 3 | 3 | 5 | 3 | 2 | A | 8511.4134  | 0.3  |
| 6 | 3 | 3 | 5 | 3 | 2 | E | 8510.9934  | 0.5  |
| 6 | 4 | 3 | 5 | 4 | 2 | A | 8499.6479  | -0.6 |
| 6 | 4 | 3 | 5 | 4 | 2 | E | 8499.6698  | -1.1 |
| 6 | 4 | 2 | 5 | 4 | 1 | A | 8499.7000  | -4.7 |
| 6 | 4 | 2 | 5 | 4 | 1 | E | 8499.6698  | 0.1  |
| 7 | 0 | 7 | 6 | 0 | 6 | A | 9668.9394  | -2.1 |
| 7 | 0 | 7 | 6 | 0 | 6 | E | 9668.9394  | 2.5  |
| 7 | 1 | 7 | 6 | 1 | 6 | A | 9387.2896  | -1.3 |
| 7 | 1 | 7 | 6 | 1 | 6 | E | 9387.2896  | 1.7  |
| 7 | 1 | 6 | 6 | 1 | 5 | A | 10295.7410 | 1.8  |
| 7 | 1 | 6 | 6 | 1 | 5 | E | 10295.7280 | -1.2 |
| 7 | 2 | 6 | 6 | 2 | 5 | A | 9865.0829  | -2.6 |
| 7 | 2 | 6 | 6 | 2 | 5 | E | 9865.0829  | 2.8  |
| 7 | 2 | 5 | 6 | 2 | 4 | A | 10094.9213 | 1.7  |
| 7 | 2 | 5 | 6 | 2 | 4 | E | 10094.9070 | -1.8 |
| 7 | 3 | 5 | 6 | 3 | 4 | A | 9929.7397  | 0.1  |
| 7 | 3 | 5 | 6 | 3 | 4 | E | 9929.9015  | 0.5  |
| 7 | 3 | 4 | 6 | 3 | 3 | A | 9941.0518  | -1.7 |
| 7 | 3 | 4 | 6 | 3 | 3 | E | 9940.8768  | -0.2 |
| 7 | 4 | 4 | 6 | 4 | 3 | A | 9920.6127  | -1.6 |
| 7 | 4 | 4 | 6 | 4 | 3 | E | 9920.7027  | 4.9  |
| 7 | 4 | 3 | 6 | 4 | 2 | A | 9920.7964  | -4.8 |
| 7 | 4 | 3 | 6 | 4 | 2 | E | 9920.7011  | -1.8 |
| 8 | 0 | 8 | 7 | 0 | 7 | A | 10981.0574 | -2.3 |
| 8 | 0 | 8 | 7 | 0 | 7 | E | 10981.0574 | 2.3  |
| 8 | 1 | 8 | 7 | 1 | 7 | A | 10711.0634 | -1.5 |
| 8 | 1 | 8 | 7 | 1 | 7 | E | 10711.0634 | 1.8  |
| 8 | 1 | 7 | 7 | 1 | 6 | A | 11739.7484 | 2.4  |
| 8 | 1 | 7 | 7 | 1 | 6 | E | 11739.7337 | -1.1 |
| 8 | 2 | 7 | 7 | 2 | 6 | A | 11259.9534 | 1.1  |
| 8 | 2 | 7 | 7 | 2 | 6 | E | 11259.9451 | -0.4 |
| 8 | 2 | 6 | 7 | 2 | 5 | A | 11591.4755 | 1.4  |
| 8 | 2 | 6 | 7 | 2 | 5 | E | 11591.4610 | -1.2 |
| 8 | 3 | 6 | 7 | 3 | 5 | A | 11354.6138 | -0.9 |
| 8 | 3 | 6 | 7 | 3 | 5 | E | 11354.6713 | 0.8  |
| 8 | 3 | 5 | 7 | 3 | 4 | A | 11377.0823 | -2.0 |
| 8 | 3 | 5 | 7 | 3 | 4 | E | 11377.0113 | 0.4  |
| 8 | 4 | 5 | 7 | 4 | 4 | A | 11343.5304 | -1.6 |
| 8 | 4 | 5 | 7 | 4 | 4 | E | 11343.7481 | -1.0 |
| 8 | 4 | 4 | 7 | 4 | 3 | A | 11344.0440 | -1.0 |
| 8 | 4 | 4 | 7 | 4 | 3 | E | 11343.8110 | 0.2  |

---

---

|    |   |    |    |   |    |   |            |      |
|----|---|----|----|---|----|---|------------|------|
| 9  | 0 | 9  | 8  | 0 | 8  | A | 12276.3025 | -1.4 |
| 9  | 0 | 9  | 8  | 0 | 8  | E | 12276.3025 | 3.0  |
| 9  | 1 | 9  | 8  | 1 | 8  | A | 12029.4564 | -1.5 |
| 9  | 1 | 9  | 8  | 1 | 8  | E | 12029.4564 | 2.0  |
| 9  | 1 | 8  | 8  | 1 | 7  | A | 13171.2218 | 3.0  |
| 9  | 1 | 8  | 8  | 1 | 7  | E | 13171.2059 | -0.8 |
| 9  | 2 | 8  | 8  | 2 | 7  | A | 12649.1609 | 1.4  |
| 9  | 2 | 8  | 8  | 2 | 7  | E | 12649.1511 | -0.4 |
| 9  | 2 | 7  | 8  | 2 | 6  | A | 13098.8534 | 1.1  |
| 9  | 2 | 7  | 8  | 2 | 6  | E | 13098.8371 | -1.7 |
| 9  | 3 | 7  | 8  | 3 | 6  | A | 12780.4986 | -0.5 |
| 9  | 3 | 7  | 8  | 3 | 6  | E | 12780.5156 | -0.8 |
| 9  | 3 | 6  | 8  | 3 | 5  | A | 12821.2669 | -1.7 |
| 9  | 3 | 6  | 8  | 3 | 5  | E | 12821.2320 | 0.9  |
| 9  | 4 | 6  | 8  | 4 | 5  | A | 12768.6088 | -2.1 |
| 9  | 4 | 6  | 8  | 4 | 5  | E | 12769.0180 | -0.4 |
| 9  | 4 | 5  | 8  | 4 | 4  | A | 12769.8361 | -2.1 |
| 9  | 4 | 5  | 8  | 4 | 4  | E | 12769.4113 | 0.0  |
| 10 | 0 | 10 | 9  | 0 | 9  | A | 13558.8483 | -1.8 |
| 10 | 0 | 10 | 9  | 0 | 9  | E | 13558.8483 | 2.5  |
| 10 | 1 | 10 | 9  | 1 | 9  | A | 13342.6007 | -1.8 |
| 10 | 1 | 10 | 9  | 1 | 9  | E | 13342.6007 | 1.8  |
| 10 | 1 | 9  | 9  | 1 | 8  | A | 14587.6299 | 2.3  |
| 10 | 1 | 9  | 9  | 1 | 8  | E | 14587.6150 | 0.3  |
| 10 | 2 | 9  | 9  | 2 | 8  | A | 14032.1130 | 2.1  |
| 10 | 2 | 9  | 9  | 2 | 8  | E | 14032.1022 | 0.1  |
| 10 | 2 | 8  | 9  | 2 | 7  | A | 14611.9661 | 2.2  |
| 10 | 2 | 8  | 9  | 2 | 7  | E | 14611.9454 | -3.4 |
| 10 | 3 | 8  | 9  | 3 | 7  | A | 14206.7152 | 0.9  |
| 10 | 3 | 8  | 9  | 3 | 7  | E | 14206.7152 | -0.7 |
| 10 | 3 | 7  | 9  | 3 | 6  | A | 14275.5758 | -3.2 |
| 10 | 3 | 7  | 9  | 3 | 6  | E | 14275.5556 | 1.0  |
| 10 | 4 | 7  | 9  | 4 | 6  | A | 14196.0069 | -1.4 |
| 10 | 4 | 7  | 9  | 4 | 6  | E | 14196.4945 | 0.4  |
| 10 | 4 | 6  | 9  | 4 | 5  | A | 14198.6548 | -1.4 |
| 10 | 4 | 6  | 9  | 4 | 5  | E | 14198.1478 | -0.8 |
| 11 | 0 | 11 | 10 | 0 | 10 | A | 14833.2527 | -2.7 |
| 11 | 0 | 11 | 10 | 0 | 10 | E | 14833.2527 | 1.4  |
| 11 | 1 | 11 | 10 | 1 | 10 | A | 14650.7948 | -0.4 |
| 11 | 1 | 11 | 10 | 1 | 10 | E | 14650.7948 | 3.3  |
| 11 | 1 | 10 | 10 | 1 | 9  | A | 15986.3686 | 3.0  |
| 11 | 1 | 10 | 10 | 1 | 9  | E | 15986.3511 | -1.1 |
| 11 | 2 | 10 | 10 | 2 | 9  | A | 15408.2811 | 0.5  |
| 11 | 2 | 10 | 10 | 2 | 9  | E | 15408.2709 | -0.2 |

---

---

|    |   |    |    |   |    |   |            |      |
|----|---|----|----|---|----|---|------------|------|
| 11 | 2 | 9  | 10 | 2 | 8  | A | 16125.2343 | -0.4 |
| 11 | 2 | 9  | 10 | 2 | 8  | E | 16125.2173 | -0.5 |
| 11 | 3 | 9  | 10 | 3 | 8  | A | 15632.4158 | -4.1 |
| 11 | 3 | 9  | 10 | 3 | 8  | E | 15632.4158 | 1.6  |
| 12 | 0 | 12 | 11 | 0 | 11 | A | 16103.5377 | -2.4 |
| 12 | 0 | 12 | 11 | 0 | 11 | E | 16103.5377 | 1.6  |
| 12 | 1 | 12 | 11 | 1 | 11 | A | 15954.4557 | -1.6 |
| 12 | 1 | 12 | 11 | 1 | 11 | E | 15954.4557 | 2.2  |
| 13 | 0 | 13 | 12 | 0 | 12 | A | 17372.6703 | -0.9 |
| 13 | 0 | 13 | 12 | 0 | 12 | E | 17372.6703 | 3.0  |
| 13 | 1 | 13 | 12 | 1 | 12 | A | 17254.0910 | -1.3 |
| 13 | 1 | 13 | 12 | 1 | 12 | E | 17254.0910 | 2.6  |
| 2  | 1 | 2  | 1  | 0 | 1  | A | 5597.2451  | 8.7  |
| 2  | 1 | 2  | 1  | 0 | 1  | E | 5597.2233  | -0.1 |
| 2  | 2 | 1  | 1  | 1 | 0  | A | 11660.7282 | -1.8 |
| 2  | 2 | 1  | 1  | 1 | 0  | E | 11660.4725 | 2.3  |
| 2  | 2 | 0  | 1  | 1 | 1  | A | 11796.4911 | 1.4  |
| 2  | 2 | 0  | 1  | 1 | 1  | E | 11796.6746 | 0.6  |
| 3  | 2 | 2  | 2  | 1 | 1  | A | 12943.4694 | -3.9 |
| 3  | 2 | 2  | 2  | 1 | 1  | E | 12943.3915 | 2.3  |
| 3  | 3 | 1  | 2  | 2 | 0  | A | 19070.9753 | 1.7  |
| 3  | 3 | 1  | 2  | 2 | 0  | E | 19069.2255 | -1.9 |
| 3  | 3 | 0  | 2  | 2 | 1  | A | 19075.4295 | 1.2  |
| 3  | 3 | 0  | 2  | 2 | 1  | E | 19077.0482 | -1.3 |
| 4  | 1 | 4  | 3  | 0 | 3  | A | 7976.2784  | 7.0  |
| 4  | 1 | 4  | 3  | 0 | 3  | E | 7976.2590  | -1.2 |
| 4  | 2 | 3  | 3  | 1 | 2  | A | 14159.8986 | 1.5  |
| 4  | 2 | 3  | 3  | 1 | 2  | E | 14159.8447 | 0.1  |
| 5  | 1 | 5  | 4  | 0 | 4  | A | 9087.1155  | 6.2  |
| 5  | 1 | 5  | 4  | 0 | 4  | E | 9087.0984  | -1.1 |
| 5  | 2 | 4  | 4  | 1 | 3  | A | 15310.5570 | 4.8  |
| 5  | 2 | 4  | 4  | 1 | 3  | E | 15310.5099 | 0.2  |
| 6  | 0 | 6  | 5  | 1 | 5  | A | 6234.8685  | 1.7  |
| 6  | 0 | 6  | 5  | 1 | 5  | E | 6234.8685  | 0.5  |
| 6  | 1 | 6  | 5  | 0 | 5  | A | 10160.4731 | 3.8  |
| 6  | 1 | 6  | 5  | 0 | 5  | E | 10160.4601 | -0.9 |
| 6  | 2 | 5  | 5  | 1 | 4  | A | 16396.6409 | 1.3  |
| 6  | 2 | 5  | 5  | 1 | 4  | E | 16396.6027 | 0.7  |
| 6  | 2 | 4  | 5  | 1 | 5  | A | 18663.6460 | -7.3 |
| 6  | 2 | 4  | 5  | 1 | 5  | E | 18663.6046 | 0.8  |
| 7  | 0 | 7  | 6  | 1 | 6  | A | 7845.6136  | 0.1  |
| 7  | 0 | 7  | 6  | 1 | 6  | E | 7845.6136  | 0.8  |
| 7  | 1 | 7  | 6  | 0 | 6  | A | 11210.6113 | -7.6 |
| 7  | 1 | 7  | 6  | 0 | 6  | E | 11210.6113 | -0.7 |

---



---

|    |   |    |    |   |    |   |            |      |
|----|---|----|----|---|----|---|------------|------|
| 7  | 2 | 6  | 6  | 1 | 5  | A | 17420.2085 | -2.9 |
| 7  | 2 | 6  | 6  | 1 | 5  | E | 17420.1791 | 1.8  |
| 8  | 0 | 8  | 7  | 1 | 7  | A | 9439.3813  | -1.1 |
| 8  | 0 | 8  | 7  | 1 | 7  | E | 9439.3813  | 1.3  |
| 8  | 1 | 8  | 7  | 0 | 7  | A | 12252.7369 | -5.4 |
| 8  | 1 | 8  | 7  | 0 | 7  | E | 12252.7369 | 0.1  |
| 8  | 2 | 7  | 7  | 1 | 6  | A | 18384.4197 | -4.8 |
| 8  | 2 | 7  | 7  | 1 | 6  | E | 18384.3965 | 2.9  |
| 9  | 0 | 9  | 8  | 1 | 8  | A | 11004.6198 | -1.6 |
| 9  | 0 | 9  | 8  | 1 | 8  | E | 11004.6198 | 2.0  |
| 9  | 1 | 9  | 8  | 0 | 8  | A | 13301.1370 | -3.4 |
| 9  | 1 | 9  | 8  | 0 | 8  | E | 13301.1370 | 1.0  |
| 9  | 2 | 8  | 8  | 1 | 7  | A | 19293.8340 | -4.0 |
| 9  | 2 | 8  | 8  | 1 | 7  | E | 19293.8141 | 3.7  |
| 10 | 0 | 10 | 9  | 1 | 9  | A | 12534.0116 | -2.1 |
| 10 | 0 | 10 | 9  | 1 | 9  | E | 12534.0116 | 2.3  |
| 10 | 1 | 10 | 9  | 0 | 9  | A | 14367.4369 | -2.1 |
| 10 | 1 | 10 | 9  | 0 | 9  | E | 14367.4369 | 1.4  |
| 11 | 0 | 11 | 10 | 1 | 10 | A | 14024.6647 | -1.8 |
| 11 | 0 | 11 | 10 | 1 | 10 | E | 14024.6647 | 3.1  |
| 11 | 1 | 11 | 10 | 0 | 10 | A | 15459.3825 | -1.5 |
| 11 | 1 | 11 | 10 | 0 | 10 | E | 15459.3825 | 1.4  |
| 12 | 0 | 12 | 11 | 1 | 11 | A | 15477.4096 | -1.8 |
| 12 | 0 | 12 | 11 | 1 | 11 | E | 15477.4096 | 3.3  |
| 12 | 1 | 12 | 11 | 0 | 11 | A | 16580.5847 | -1.3 |
| 12 | 1 | 12 | 11 | 0 | 11 | E | 16580.5847 | 1.4  |
| 13 | 0 | 13 | 12 | 1 | 12 | A | 16895.6244 | -0.9 |
| 13 | 0 | 13 | 12 | 1 | 12 | E | 16895.6244 | 4.2  |
| 13 | 1 | 13 | 12 | 0 | 12 | A | 17731.1353 | -2.9 |
| 13 | 1 | 13 | 12 | 0 | 12 | E | 17731.1353 | -0.3 |
| 14 | 0 | 14 | 13 | 1 | 13 | A | 18284.0214 | -2.1 |
| 14 | 0 | 14 | 13 | 1 | 13 | E | 18284.0214 | 2.9  |
| 14 | 1 | 14 | 13 | 0 | 13 | A | 18908.7079 | -1.9 |
| 14 | 1 | 14 | 13 | 0 | 13 | E | 18908.7079 | 0.7  |

---

**Table S2** Experimental transition frequencies ( $\nu_{\text{obs}}$ , MHz) and fit deviations ( $\nu_{\text{obs-calc}}$ , kHz) of  $^{13}\text{C}1$  isotopologue of 4FAP.

| $J'$ | $K_a'$ | $K_c'$ | $J''$ | $K_a''$ | $K_c''$ | State | $\nu_{\text{obs}}/\text{MHz}$ | $\nu_{\text{obs-calc}}/\text{kHz}$ |
|------|--------|--------|-------|---------|---------|-------|-------------------------------|------------------------------------|
| 6    | 0      | 6      | 5     | 0       | 5       | A     | 8331.8457                     | -1.3                               |
| 6    | 0      | 6      | 5     | 0       | 5       | E     | 8331.8457                     | 3.2                                |
| 7    | 0      | 7      | 6     | 0       | 6       | A     | 9662.9171                     | 6.3                                |
| 7    | 0      | 7      | 6     | 0       | 6       | E     | 9662.9062                     | 0.0                                |
| 8    | 0      | 8      | 7     | 0       | 7       | A     | 10974.3156                    | -9.1                               |
| 8    | 0      | 8      | 7     | 0       | 7       | E     | 10974.3156                    | -4.5                               |
| 2    | 1      | 2      | 1     | 0       | 1       | A     | 5596.1890                     | 8.4                                |
| 2    | 1      | 2      | 1     | 0       | 1       | E     | 5596.1663                     | -1.2                               |
| 3    | 1      | 3      | 2     | 0       | 2       | A     | 6814.2294                     | 9.8                                |
| 3    | 1      | 3      | 2     | 0       | 2       | E     | 6814.2033                     | -4.1                               |
| 3    | 2      | 2      | 2     | 1       | 1       | A     | 12942.6186                    | -2.5                               |
| 3    | 2      | 2      | 2     | 1       | 1       | E     | 12942.5312                    | -5.6                               |
| 4    | 1      | 4      | 3     | 0       | 3       | A     | 7973.9204                     | 0.1                                |
| 4    | 1      | 4      | 3     | 0       | 3       | E     | 7973.8975                     | -1.6                               |
| 4    | 2      | 3      | 3     | 1       | 2       | A     | 14158.3650                    | 0.4                                |
| 4    | 2      | 3      | 3     | 1       | 2       | E     | 14158.3059                    | -6.1                               |
| 5    | 1      | 5      | 4     | 0       | 4       | A     | 9084.1780                     | 5.9                                |
| 5    | 1      | 5      | 4     | 0       | 4       | E     | 9084.1602                     | -2.0                               |
| 5    | 2      | 4      | 4     | 1       | 3       | A     | 15308.4429                    | 3.8                                |
| 5    | 2      | 4      | 4     | 1       | 3       | E     | 15308.3808                    | -5.8                               |
| 6    | 1      | 6      | 5     | 0       | 5       | A     | 10156.9667                    | 2.3                                |
| 6    | 1      | 6      | 5     | 0       | 5       | E     | 10156.9549                    | -1.1                               |
| 7    | 1      | 7      | 6     | 0       | 6       | A     | 11206.5151                    | -2.7                               |
| 7    | 1      | 7      | 6     | 0       | 6       | E     | 11206.5036                    | -7.3                               |
| 7    | 0      | 7      | 6     | 1       | 6       | A     | 7837.7944                     | 1.0                                |
| 7    | 0      | 7      | 6     | 1       | 6       | E     | 7837.7944                     | 1.7                                |
| 8    | 1      | 8      | 7     | 0       | 7       | A     | 12247.9898                    | 5.9                                |
| 8    | 1      | 8      | 7     | 0       | 7       | E     | 12247.9780                    | -0.4                               |
| 8    | 0      | 8      | 7     | 1       | 7       | A     | 9430.7164                     | -1.4                               |
| 8    | 0      | 8      | 7     | 1       | 7       | E     | 9430.7164                     | 0.9                                |
| 9    | 1      | 9      | 8     | 0       | 8       | A     | 13295.6400                    | -3.2                               |
| 9    | 1      | 9      | 8     | 0       | 8       | E     | 13295.6400                    | 1.1                                |
| 9    | 0      | 9      | 8     | 1       | 8       | A     | 10995.2172                    | -1.8                               |
| 9    | 0      | 9      | 8     | 1       | 8       | E     | 10995.2172                    | 1.7                                |

**Table S3** Experimental transition frequencies ( $\nu_{\text{obs}}$ , MHz) and fit deviations ( $\nu_{\text{obs-calc}}$ , kHz) of  $^{13}\text{C}2$  isotopologue of 4FAP.

| $J'$ | $K_a'$ | $K_c'$ | $J''$ | $K_a''$ | $K_c''$ | State | $\nu_{\text{obs}}/\text{MHz}$ | $\nu_{\text{obs-calc}}/\text{kHz}$ |
|------|--------|--------|-------|---------|---------|-------|-------------------------------|------------------------------------|
| 6    | 0      | 6      | 5     | 0       | 5       | A     | 8325.6816                     | -4.0                               |
| 6    | 0      | 6      | 5     | 0       | 5       | E     | 8325.6816                     | 0.5                                |
| 7    | 0      | 7      | 6     | 0       | 6       | A     | 9654.0914                     | -4.2                               |
| 7    | 0      | 7      | 6     | 0       | 6       | E     | 9654.0914                     | 0.4                                |
| 8    | 0      | 8      | 7     | 0       | 7       | A     | 10962.5766                    | -3.6                               |
| 8    | 0      | 8      | 7     | 0       | 7       | E     | 10962.5766                    | 0.9                                |
| 2    | 2      | 1      | 1     | 1       | 0       | A     | 11542.9670                    | -4.1                               |
| 2    | 2      | 1      | 1     | 1       | 0       | E     | 11542.7218                    | -1.1                               |
| 3    | 1      | 3      | 2     | 0       | 2       | A     | 6770.6325                     | -8.2                               |
| 3    | 1      | 3      | 2     | 0       | 2       | E     | 6770.6325                     | 3.7                                |
| 4    | 1      | 4      | 3     | 0       | 3       | A     | 7927.6802                     | 9.0                                |
| 4    | 1      | 4      | 3     | 0       | 3       | E     | 7927.6593                     | -1.0                               |
| 4    | 2      | 3      | 3     | 1       | 2       | A     | 14036.7893                    | 4.0                                |
| 4    | 2      | 3      | 3     | 1       | 2       | E     | 14036.7347                    | 0.3                                |
| 5    | 1      | 5      | 4     | 0       | 4       | A     | 9035.1562                     | 8.8                                |
| 5    | 1      | 5      | 4     | 0       | 4       | E     | 9035.1366                     | -1.2                               |
| 6    | 1      | 6      | 5     | 0       | 5       | A     | 10105.4248                    | 3.3                                |
| 6    | 1      | 6      | 5     | 0       | 5       | E     | 10105.4115                    | -1.9                               |
| 6    | 0      | 6      | 5     | 1       | 5       | A     | 6266.8847                     | 1.7                                |
| 6    | 0      | 6      | 5     | 1       | 5       | E     | 6266.8847                     | 0.7                                |
| 7    | 1      | 7      | 6     | 0       | 6       | A     | 11153.1304                    | -6.9                               |
| 7    | 1      | 7      | 6     | 0       | 6       | E     | 11153.1304                    | -0.2                               |
| 7    | 0      | 7      | 6     | 1       | 6       | A     | 7874.3583                     | -1.4                               |
| 7    | 0      | 7      | 6     | 1       | 6       | E     | 7874.3583                     | -0.4                               |
| 8    | 1      | 8      | 7     | 0       | 7       | A     | 12193.7779                    | -4.3                               |
| 8    | 1      | 8      | 7     | 0       | 7       | E     | 12193.7779                    | 1.1                                |
| 8    | 0      | 8      | 7     | 1       | 7       | A     | 9463.5386                     | 0.1                                |
| 8    | 0      | 8      | 7     | 1       | 7       | E     | 9463.5386                     | 2.6                                |
| 9    | 1      | 9      | 8     | 0       | 8       | A     | 13241.7946                    | 0.1                                |
| 9    | 1      | 9      | 8     | 0       | 8       | E     | 13241.7946                    | 4.3                                |
| 9    | 0      | 9      | 8     | 1       | 8       | A     | 11022.9799                    | -1.4                               |
| 9    | 0      | 9      | 8     | 1       | 8       | E     | 11022.9799                    | 2.3                                |

**Table S4** Experimental transition frequencies ( $\nu_{\text{obs}}$ , MHz) and fit deviations ( $\nu_{\text{obs-calc}}$ , kHz) of  $^{13}\text{C}3$  isotopologue of 4FAP.

| $J'$ | $K_a'$ | $K_c'$ | $J''$ | $K_a''$ | $K_c''$ | State | $\nu_{\text{obs}}/\text{MHz}$ | $\nu_{\text{obs-calc}}/\text{kHz}$ |
|------|--------|--------|-------|---------|---------|-------|-------------------------------|------------------------------------|
| 5    | 0      | 5      | 4     | 0       | 4       | A     | 6957.9828                     | -3.1                               |
| 5    | 0      | 5      | 4     | 0       | 4       | E     | 6957.9828                     | 1.0                                |
| 6    | 0      | 6      | 5     | 0       | 5       | A     | 8304.1677                     | -3.1                               |
| 6    | 0      | 6      | 5     | 0       | 5       | E     | 8304.1677                     | 1.4                                |
| 7    | 0      | 7      | 6     | 0       | 6       | A     | 9629.6122                     | -0.7                               |
| 7    | 0      | 7      | 6     | 0       | 6       | E     | 9629.6122                     | 3.9                                |
| 8    | 0      | 8      | 7     | 0       | 7       | A     | 10935.2570                    | -2.5                               |
| 8    | 0      | 8      | 7     | 0       | 7       | E     | 10935.2570                    | 2.0                                |
| 2    | 2      | 1      | 1     | 1       | 0       | A     | 11543.6703                    | -8.3                               |
| 2    | 2      | 1      | 1     | 1       | 0       | E     | 11543.4249                    | -3.1                               |
| 3    | 1      | 3      | 2     | 0       | 2       | A     | 6763.9295                     | 2.7                                |
| 3    | 1      | 3      | 2     | 0       | 2       | E     | 6763.9035                     | -1.3                               |
| 4    | 1      | 4      | 3     | 0       | 3       | A     | 7918.4551                     | 6.7                                |
| 4    | 1      | 4      | 3     | 0       | 3       | E     | 7918.4352                     | -2.3                               |
| 4    | 2      | 3      | 3     | 1       | 2       | A     | 14031.6096                    | 2.9                                |
| 4    | 2      | 3      | 3     | 1       | 2       | E     | 14031.5584                    | 2.8                                |
| 5    | 1      | 5      | 4     | 0       | 4       | A     | 9023.6008                     | 5.1                                |
| 5    | 1      | 5      | 4     | 0       | 4       | E     | 9023.5845                     | -1.6                               |
| 6    | 1      | 6      | 5     | 0       | 5       | A     | 10091.5709                    | 4.5                                |
| 6    | 1      | 6      | 5     | 0       | 5       | E     | 10091.5555                    | -2.8                               |
| 6    | 0      | 6      | 5     | 1       | 5       | A     | 6238.5575                     | -3.5                               |
| 6    | 0      | 6      | 5     | 1       | 5       | E     | 6238.5525                     | -9.6                               |
| 7    | 1      | 7      | 6     | 0       | 6       | A     | 11136.8496                    | 1.0                                |
| 7    | 1      | 7      | 6     | 0       | 6       | E     | 11136.8386                    | -3.3                               |
| 7    | 0      | 7      | 6     | 1       | 6       | A     | 7842.2178                     | 0.6                                |
| 7    | 0      | 7      | 6     | 1       | 6       | E     | 7842.2178                     | 1.4                                |
| 8    | 1      | 8      | 7     | 0       | 7       | A     | 12174.7931                    | -0.9                               |
| 8    | 1      | 8      | 7     | 0       | 7       | E     | 12174.7875                    | -1.2                               |
| 8    | 0      | 8      | 7     | 1       | 7       | A     | 9428.0252                     | 1.4                                |
| 8    | 0      | 8      | 7     | 1       | 7       | E     | 9428.0252                     | 3.8                                |
| 9    | 1      | 9      | 8     | 0       | 8       | A     | 13219.7541                    | -4.6                               |
| 9    | 1      | 9      | 8     | 0       | 8       | E     | 13219.7541                    | -0.4                               |
| 9    | 0      | 9      | 8     | 1       | 8       | A     | 10984.5396                    | -0.5                               |
| 9    | 0      | 9      | 8     | 1       | 8       | E     | 10984.5396                    | 3.1                                |

**Table S5** Experimental transition frequencies ( $\nu_{\text{obs}}$ , MHz) and fit deviations ( $\nu_{\text{obs-calc}}$ , kHz) of  $^{13}\text{C}_4$  isotopologue of 4FAP.

| $J'$ | $K_a'$ | $K_c'$ | $J''$ | $K_a''$ | $K_c''$ | State | $\nu_{\text{obs}}/\text{MHz}$ | $\nu_{\text{obs-calc}}/\text{kHz}$ |
|------|--------|--------|-------|---------|---------|-------|-------------------------------|------------------------------------|
| 5    | 0      | 5      | 4     | 0       | 4       | A     | 6945.4437                     | -4.1                               |
| 5    | 0      | 5      | 4     | 0       | 4       | E     | 6945.4437                     | 0.1                                |
| 6    | 0      | 6      | 5     | 0       | 5       | A     | 8290.8953                     | 3.2                                |
| 6    | 0      | 6      | 5     | 0       | 5       | E     | 8290.8857                     | -1.9                               |
| 7    | 0      | 7      | 6     | 0       | 6       | A     | 9616.2071                     | -2.3                               |
| 7    | 0      | 7      | 6     | 0       | 6       | E     | 9616.2022                     | -2.6                               |
| 7    | 1      | 7      | 6     | 1       | 6       | A     | 9335.7978                     | -3.1                               |
| 7    | 1      | 7      | 6     | 1       | 6       | E     | 9335.7978                     | -0.1                               |
| 8    | 0      | 8      | 7     | 0       | 7       | A     | 10922.1147                    | -2.7                               |
| 8    | 0      | 8      | 7     | 0       | 7       | E     | 10922.1147                    | 1.8                                |
| 2    | 2      | 1      | 1     | 1       | 0       | A     | 11657.6625                    | -5.5                               |
| 2    | 2      | 1      | 1     | 1       | 0       | E     | 11657.4016                    | -1.6                               |
| 3    | 1      | 3      | 2     | 0       | 2       | A     | 6799.8878                     | 6.3                                |
| 3    | 1      | 3      | 2     | 0       | 2       | E     | 6799.8675                     | -1.8                               |
| 4    | 1      | 4      | 3     | 0       | 3       | A     | 7954.7389                     | 7.0                                |
| 4    | 1      | 4      | 3     | 0       | 3       | E     | 7954.7190                     | -1.8                               |
| 4    | 2      | 3      | 3     | 1       | 2       | A     | 14144.0868                    | 1.5                                |
| 4    | 2      | 3      | 3     | 1       | 2       | E     | 14144.0360                    | 3.5                                |
| 5    | 1      | 5      | 4     | 0       | 4       | A     | 9060.4781                     | 2.5                                |
| 5    | 1      | 5      | 4     | 0       | 4       | E     | 9060.4621                     | -3.6                               |
| 6    | 1      | 6      | 5     | 0       | 5       | A     | 10128.8247                    | 2.3                                |
| 6    | 1      | 6      | 5     | 0       | 5       | E     | 10128.8119                    | -2.1                               |
| 7    | 1      | 7      | 6     | 0       | 6       | A     | 11173.7370                    | 5.8                                |
| 7    | 1      | 7      | 6     | 0       | 6       | E     | 11173.7211                    | -3.2                               |
| 7    | 0      | 7      | 6     | 1       | 6       | A     | 7778.2802                     | 1.1                                |
| 7    | 0      | 7      | 6     | 1       | 6       | E     | 7778.2802                     | 1.8                                |
| 8    | 1      | 8      | 7     | 0       | 7       | A     | 12210.1145                    | 3.5                                |
| 8    | 1      | 8      | 7     | 0       | 7       | E     | 12210.1040                    | -1.5                               |
| 8    | 0      | 8      | 7     | 1       | 7       | A     | 9364.5935                     | -2.1                               |
| 8    | 0      | 8      | 7     | 1       | 7       | E     | 9364.5935                     | 0.1                                |
| 9    | 1      | 9      | 8     | 0       | 8       | A     | 13252.0857                    | -0.5                               |
| 9    | 1      | 9      | 8     | 0       | 8       | E     | 13252.0788                    | -3.0                               |
| 9    | 0      | 9      | 8     | 1       | 8       | A     | 10923.2778                    | 0.1                                |
| 9    | 0      | 9      | 8     | 1       | 8       | E     | 10923.2778                    | 3.5                                |

**Table S6** Experimental transition frequencies ( $\nu_{\text{obs}}$ , MHz) and fit deviations ( $\nu_{\text{obs-calc}}$ , kHz) of  $^{13}\text{C}5$  isotopologue of 4FAP.

| $J'$ | $K_a'$ | $K_c'$ | $J''$ | $K_a''$ | $K_c''$ | State | $\nu_{\text{obs}}/\text{MHz}$ | $\nu_{\text{obs-calc}}/\text{kHz}$ |
|------|--------|--------|-------|---------|---------|-------|-------------------------------|------------------------------------|
| 6    | 0      | 6      | 5     | 0       | 5       | A     | 8304.6475                     | -1.4                               |
| 6    | 0      | 6      | 5     | 0       | 5       | E     | 8304.6475                     | 3.0                                |
| 7    | 0      | 7      | 6     | 0       | 6       | A     | 9630.0855                     | -2.1                               |
| 7    | 0      | 7      | 6     | 0       | 6       | E     | 9630.0855                     | 2.4                                |
| 8    | 0      | 8      | 7     | 0       | 7       | A     | 10935.7136                    | -2.6                               |
| 8    | 0      | 8      | 7     | 0       | 7       | E     | 10935.7136                    | 1.9                                |
| 2    | 2      | 1      | 1     | 1       | 0       | A     | 11539.1724                    | -8.3                               |
| 2    | 2      | 1      | 1     | 1       | 0       | E     | 11538.9301                    | -0.5                               |
| 3    | 1      | 3      | 2     | 0       | 2       | A     | 6762.4884                     | 6.8                                |
| 3    | 1      | 3      | 2     | 0       | 2       | E     | 6762.4679                     | -1.8                               |
| 3    | 2      | 2      | 2     | 1       | 1       | A     | 12816.4727                    | 7.2                                |
| 3    | 2      | 2      | 2     | 1       | 1       | E     | 12816.3849                    | 0.8                                |
| 4    | 1      | 4      | 3     | 0       | 3       | A     | 7916.9988                     | 4.6                                |
| 4    | 1      | 4      | 3     | 0       | 3       | E     | 7916.9808                     | -2.5                               |
| 4    | 2      | 3      | 3     | 1       | 2       | A     | 14027.1574                    | 2.8                                |
| 4    | 2      | 3      | 3     | 1       | 2       | E     | 14027.1032                    | -0.4                               |
| 5    | 1      | 5      | 4     | 0       | 4       | A     | 9022.1178                     | 5.9                                |
| 5    | 1      | 5      | 4     | 0       | 4       | E     | 9022.1013                     | -1.0                               |
| 5    | 2      | 4      | 4     | 1       | 3       | A     | 15171.8093                    | -4.1                               |
| 5    | 2      | 4      | 4     | 1       | 3       | E     | 15171.7712                    | -0.8                               |
| 6    | 1      | 6      | 5     | 0       | 5       | A     | 10090.0686                    | 5.9                                |
| 6    | 1      | 6      | 5     | 0       | 5       | E     | 10090.0542                    | -0.3                               |
| 7    | 1      | 7      | 6     | 0       | 6       | A     | 11135.3485                    | -6.9                               |
| 7    | 1      | 7      | 6     | 0       | 6       | E     | 11135.3485                    | -0.3                               |
| 7    | 0      | 7      | 6     | 1       | 6       | A     | 7844.6730                     | -0.9                               |
| 7    | 0      | 7      | 6     | 1       | 6       | E     | 7844.6730                     | 0.0                                |
| 8    | 1      | 8      | 7     | 0       | 7       | A     | 12173.3551                    | -4.2                               |
| 8    | 1      | 8      | 7     | 0       | 7       | E     | 12173.3551                    | 1.1                                |
| 8    | 0      | 8      | 7     | 1       | 7       | A     | 9430.4471                     | -1.3                               |
| 8    | 0      | 8      | 7     | 1       | 7       | E     | 9430.4471                     | 1.2                                |
| 9    | 1      | 9      | 8     | 0       | 8       | A     | 13218.4371                    | -2.0                               |
| 9    | 1      | 9      | 8     | 0       | 8       | E     | 13218.4378                    | 2.9                                |
| 9    | 0      | 9      | 8     | 1       | 8       | A     | 10986.8655                    | -2.1                               |
| 9    | 0      | 9      | 8     | 1       | 8       | E     | 10986.8655                    | 1.5                                |

**Table S7** Experimental transition frequencies ( $\nu_{\text{obs}}$ , MHz) and fit deviations ( $\nu_{\text{obs-calc}}$ , kHz) of  $^{13}\text{C}6$  isotopologue of 4FAP.

| $J'$ | $K_a'$ | $K_c'$ | $J''$ | $K_a''$ | $K_c''$ | State | $\nu_{\text{obs}}/\text{MHz}$ | $\nu_{\text{obs-calc}}/\text{kHz}$ |
|------|--------|--------|-------|---------|---------|-------|-------------------------------|------------------------------------|
| 5    | 0      | 5      | 4     | 0       | 4       | A     | 6976.5462                     | -4.9                               |
| 5    | 0      | 5      | 4     | 0       | 4       | E     | 6976.5462                     | -0.7                               |
| 6    | 0      | 6      | 5     | 0       | 5       | A     | 8325.9600                     | -2.5                               |
| 6    | 0      | 6      | 5     | 0       | 5       | E     | 8325.9600                     | 2.0                                |
| 7    | 0      | 7      | 6     | 0       | 6       | A     | 9654.4510                     | -1.8                               |
| 7    | 0      | 7      | 6     | 0       | 6       | E     | 9654.4510                     | 2.8                                |
| 8    | 0      | 8      | 7     | 0       | 7       | A     | 10963.0203                    | -2.9                               |
| 8    | 0      | 8      | 7     | 0       | 7       | E     | 10963.0203                    | 1.6                                |
| 2    | 2      | 1      | 1     | 1       | 0       | A     | 11545.6704                    | -2.2                               |
| 2    | 2      | 1      | 1     | 1       | 0       | E     | 11545.4239                    | -0.2                               |
| 3    | 1      | 3      | 2     | 0       | 2       | A     | 6771.6983                     | 2.9                                |
| 3    | 1      | 3      | 2     | 0       | 2       | E     | 6771.6705                     | -2.9                               |
| 4    | 1      | 4      | 3     | 0       | 3       | A     | 7928.8027                     | 9.7                                |
| 4    | 1      | 4      | 3     | 0       | 3       | E     | 7928.7806                     | -1.5                               |
| 4    | 2      | 3      | 3     | 1       | 2       | A     | 14039.6077                    | -6.1                               |
| 4    | 2      | 3      | 3     | 1       | 2       | E     | 14039.5650                    | 2.1                                |
| 5    | 1      | 5      | 4     | 0       | 4       | A     | 9036.3567                     | 8.5                                |
| 5    | 1      | 5      | 4     | 0       | 4       | E     | 9036.3377                     | -0.9                               |
| 6    | 1      | 6      | 5     | 0       | 5       | A     | 10106.6997                    | 5.1                                |
| 6    | 1      | 6      | 5     | 0       | 5       | E     | 10106.6862                    | -0.3                               |
| 6    | 0      | 6      | 5     | 1       | 5       | A     | 6266.1670                     | 1.6                                |
| 6    | 0      | 6      | 5     | 1       | 5       | E     | 6266.1670                     | 0.6                                |
| 7    | 1      | 7      | 6     | 0       | 6       | A     | 11154.4695                    | 2.0                                |
| 7    | 1      | 7      | 6     | 0       | 6       | E     | 11154.4602                    | -0.6                               |
| 7    | 0      | 7      | 6     | 1       | 6       | A     | 7873.7212                     | 0.5                                |
| 7    | 0      | 7      | 6     | 1       | 6       | E     | 7873.7212                     | 1.5                                |
| 8    | 1      | 8      | 7     | 0       | 7       | A     | 12195.1408                    | -6.4                               |
| 8    | 1      | 8      | 7     | 0       | 7       | E     | 12195.1408                    | -1.1                               |
| 8    | 0      | 8      | 7     | 1       | 7       | A     | 9463.0082                     | -0.3                               |
| 8    | 0      | 8      | 7     | 1       | 7       | E     | 9463.0082                     | 2.1                                |
| 9    | 1      | 9      | 8     | 0       | 8       | A     | 13243.1653                    | -3.8                               |
| 9    | 1      | 9      | 8     | 0       | 8       | E     | 13243.1653                    | 0.4                                |
| 9    | 0      | 9      | 8     | 1       | 8       | A     | 11022.5842                    | -3.7                               |
| 9    | 0      | 9      | 8     | 1       | 8       | E     | 11022.5842                    | -0.1                               |

**Table S8** Experimental transition frequencies ( $\nu_{\text{obs}}$ , MHz) and fit deviations ( $\nu_{\text{obs-calc}}$ , kHz) of  $^{13}\text{C}7$  isotopologue of 4FAP.

| $J'$ | $K_a'$ | $K_c'$ | $J''$ | $K_a''$ | $K_c''$ | State | $\nu_{\text{obs}}/\text{MHz}$ | $\nu_{\text{obs-calc}}/\text{kHz}$ |
|------|--------|--------|-------|---------|---------|-------|-------------------------------|------------------------------------|
| 6    | 0      | 6      | 5     | 0       | 5       | A     | 8283.6182                     | -2.8                               |
| 6    | 0      | 6      | 5     | 0       | 5       | E     | 8283.6182                     | 1.7                                |
| 7    | 0      | 7      | 6     | 0       | 6       | A     | 9607.9046                     | -3.1                               |
| 7    | 0      | 7      | 6     | 0       | 6       | E     | 9607.9046                     | 1.5                                |
| 8    | 0      | 8      | 7     | 0       | 7       | A     | 10912.8247                    | -1.7                               |
| 8    | 0      | 8      | 7     | 0       | 7       | E     | 10912.8247                    | 2.9                                |
| 2    | 1      | 2      | 1     | 0       | 1       | A     | 5585.3990                     | 5.8                                |
| 2    | 1      | 2      | 1     | 0       | 1       | E     | 5585.3759                     | -4.3                               |
| 2    | 2      | 1      | 1     | 1       | 0       | A     | 11656.5188                    | -6.1                               |
| 2    | 2      | 1      | 1     | 1       | 0       | E     | 11656.2577                    | -1.7                               |
| 3    | 1      | 3      | 2     | 0       | 2       | A     | 6797.1339                     | 4.9                                |
| 3    | 1      | 3      | 2     | 0       | 2       | E     | 6797.1050                     | -1.7                               |
| 3    | 2      | 2      | 2     | 1       | 1       | A     | 12931.4387                    | 2.0                                |
| 3    | 2      | 2      | 2     | 1       | 1       | E     | 12931.3487                    | -2.6                               |
| 4    | 1      | 4      | 3     | 0       | 3       | A     | 7951.1062                     | 6.5                                |
| 4    | 1      | 4      | 3     | 0       | 3       | E     | 7951.0863                     | -2.2                               |
| 4    | 2      | 3      | 3     | 1       | 2       | A     | 14140.9297                    | 4.9                                |
| 4    | 2      | 3      | 3     | 1       | 2       | E     | 14140.8688                    | -3.0                               |
| 5    | 1      | 5      | 4     | 0       | 4       | A     | 9056.0371                     | 7.0                                |
| 5    | 1      | 5      | 4     | 0       | 4       | E     | 9056.0179                     | -2.3                               |
| 6    | 1      | 6      | 5     | 0       | 5       | A     | 10123.5834                    | 5.0                                |
| 6    | 1      | 6      | 5     | 0       | 5       | E     | 10123.5682                    | -1.8                               |
| 7    | 1      | 7      | 6     | 0       | 6       | A     | 11167.6589                    | 1.1                                |
| 7    | 1      | 7      | 6     | 0       | 6       | E     | 11167.6488                    | -2.1                               |
| 7    | 0      | 7      | 6     | 1       | 6       | A     | 7767.9496                     | -0.6                               |
| 7    | 0      | 7      | 6     | 1       | 6       | E     | 7767.9496                     | 0.0                                |
| 8    | 1      | 8      | 7     | 0       | 7       | A     | 12203.1363                    | 0.0                                |
| 8    | 1      | 8      | 7     | 0       | 7       | E     | 12203.1280                    | -2.8                               |
| 8    | 0      | 8      | 7     | 1       | 7       | A     | 9353.0749                     | -1.4                               |
| 8    | 0      | 8      | 7     | 1       | 7       | E     | 9353.0749                     | 0.9                                |
| 9    | 1      | 9      | 8     | 0       | 8       | A     | 13244.1063                    | -4.9                               |
| 9    | 1      | 9      | 8     | 0       | 8       | E     | 13244.1063                    | -0.5                               |
| 9    | 0      | 9      | 8     | 1       | 8       | A     | 10910.6985                    | -1.7                               |
| 9    | 0      | 9      | 8     | 1       | 8       | E     | 10910.6985                    | 1.8                                |



**Table S9** Experimental transition frequencies ( $\nu_{\text{obs}}$ , MHz) and fit deviations ( $\nu_{\text{obs-calc}}$ , kHz) of  $^{13}\text{C}8$  isotopologue of 4FAP.

| $J'$ | $K_a'$ | $K_c'$ | $J''$ | $K_a''$ | $K_c''$ | State | $\nu_{\text{obs}}/\text{MHz}$ | $\nu_{\text{obs-calc}}/\text{kHz}$ |
|------|--------|--------|-------|---------|---------|-------|-------------------------------|------------------------------------|
| 6    | 0      | 6      | 5     | 0       | 5       | A     | 8227.2873                     | -1.6                               |
| 6    | 0      | 6      | 5     | 0       | 5       | E     | 8227.2873                     | 2.7                                |
| 7    | 0      | 7      | 6     | 0       | 6       | A     | 9542.0276                     | -1.3                               |
| 7    | 0      | 7      | 6     | 0       | 6       | E     | 9542.0276                     | 3.3                                |
| 8    | 0      | 8      | 7     | 0       | 7       | A     | 10837.4289                    | -3.4                               |
| 8    | 0      | 8      | 7     | 0       | 7       | E     | 10837.4289                    | 1.1                                |
| 2    | 1      | 2      | 1     | 0       | 1       | A     | 5535.3323                     | -0.3                               |
| 2    | 1      | 2      | 1     | 0       | 1       | E     | 5535.3105                     | -9.4                               |
| 2    | 2      | 1      | 1     | 1       | 0       | A     | 11541.9182                    | 2.5                                |
| 2    | 2      | 1      | 1     | 1       | 0       | E     | 11541.6568                    | 0.2                                |
| 3    | 1      | 3      | 2     | 0       | 2       | A     | 6738.3659                     | -3.8                               |
| 3    | 1      | 3      | 2     | 0       | 2       | E     | 6738.3659                     | 8.2                                |
| 4    | 1      | 4      | 3     | 0       | 3       | A     | 7883.9029                     | 9.7                                |
| 4    | 1      | 4      | 3     | 0       | 3       | E     | 7883.8794                     | -2.8                               |
| 4    | 2      | 3      | 3     | 1       | 2       | A     | 14008.7181                    | -5.0                               |
| 4    | 2      | 3      | 3     | 1       | 2       | E     | 14008.6734                    | 2.0                                |
| 5    | 1      | 5      | 4     | 0       | 4       | A     | 8980.6451                     | 5.8                                |
| 5    | 1      | 5      | 4     | 0       | 4       | E     | 8980.6260                     | -3.6                               |
| 6    | 1      | 6      | 5     | 0       | 5       | A     | 10040.3291                    | 3.1                                |
| 6    | 1      | 6      | 5     | 0       | 5       | E     | 10040.3155                    | -2.3                               |
| 6    | 0      | 6      | 5     | 1       | 5       | A     | 6139.1076                     | 2.7                                |
| 6    | 0      | 6      | 5     | 1       | 5       | E     | 6139.1076                     | 1.5                                |
| 7    | 1      | 7      | 6     | 0       | 6       | A     | 11076.9113                    | 2.2                                |
| 7    | 1      | 7      | 6     | 0       | 6       | E     | 11076.8992                    | -3.1                               |
| 7    | 0      | 7      | 6     | 1       | 6       | A     | 7728.9913                     | -0.5                               |
| 7    | 0      | 7      | 6     | 1       | 6       | E     | 7728.9913                     | 0.2                                |
| 8    | 1      | 8      | 7     | 0       | 7       | A     | 12105.2742                    | 3.8                                |
| 8    | 1      | 8      | 7     | 0       | 7       | E     | 12105.2631                    | -1.9                               |
| 8    | 0      | 8      | 7     | 1       | 7       | A     | 9302.5505                     | -1.6                               |
| 8    | 0      | 8      | 7     | 1       | 7       | E     | 9302.5505                     | 0.7                                |
| 9    | 1      | 9      | 8     | 0       | 8       | A     | 13139.4677                    | -4.0                               |
| 9    | 1      | 9      | 8     | 0       | 8       | E     | 13139.4677                    | 0.2                                |
| 9    | 0      | 9      | 8     | 1       | 8       | A     | 10848.3542                    | -3.0                               |
| 9    | 0      | 9      | 8     | 1       | 8       | E     | 10848.3542                    | 0.4                                |

**Table S10** Comparison of the *ab initio* ( $r_e$ ), the substituted ( $r_s$ ) and the semi-experimental equilibrium ( $r_{s \rightarrow e}^{SE}$ ) coordinates of carbon atoms in 4FAP. (See Fig. S1 for the atomic labels).

|    | <i>a</i> /Å |                |                            | <i>b</i> /Å |                        |                            |
|----|-------------|----------------|----------------------------|-------------|------------------------|----------------------------|
|    | $r_e$       | $r_s$          | $r_{s \rightarrow e}^{SE}$ | $r_e$       | $r_s$                  | $r_{s \rightarrow e}^{SE}$ |
| C1 | -0.718      | ±0.693(2)      | ±0.706(2)                  | -0.0191     | 0 <sup>a</sup>         | 0.04(3)                    |
| C2 | 0.0102      | 0 <sup>a</sup> | 0 <sup>a</sup>             | -1.221      | ±1.215(1) <sup>b</sup> | ±1.215(1)                  |
| C3 | 1.404       | ±1.398(1)      | ±1.395(1)                  | -1.209      | ±1.205(1)              | ±1.204(1)                  |
| C4 | 2.060       | ±2.049(7)      | ±2.0437(7)                 | 0.0210      | 0 <sup>a</sup>         | 0 <sup>c</sup>             |
| C5 | 1.372       | ±1.367(1)      | ±1.357(1)                  | 1.230       | ±1.229(1)              | ±1.226(1)                  |
| C6 | -0.0253     | 0 <sup>a</sup> | 0 <sup>a</sup>             | 1.203       | ±1.201(1)              | ±1.197(1)                  |
| C7 | -2.217      | ±2.203(6)      | ±2.2038(7)                 | -0.0922     | 0.06(2)                | ±0.09(1)                   |
| C8 | -3.000      | ±3.0047(5)     | ±2.9851(5)                 | 1.204       | 1.192(1)               | ±1.195(1)                  |

<sup>a</sup> Imaginary values, fixed at zero.

<sup>b</sup> Errors in parenthesis are given in units of the last digit.

<sup>c</sup> The coordinate value is too small to determine, fixed at zero.

**Table S11** Theoretical, experimental and semi-experimental rotational constants of all nine isotopologues of 4FAP.

|        |       | $B_e^{\text{theo}}$ | $B_0^{\text{theo}}$ | $\Delta B_{\text{vib}}$ | $B_0^{\text{exp}}$        | $B_e^{\text{SE}}$ |
|--------|-------|---------------------|---------------------|-------------------------|---------------------------|-------------------|
| Normal | A/MHz | 3652.515            | 3629.056            | 23.459                  | 3673.1127(4) <sup>a</sup> | 3696.5717(4)      |
|        | B/MHz | 768.889             | 763.336             | 5.553                   | 772.76796(6)              | 778.32096(6)      |
|        | C/MHz | 637.956             | 633.648             | 4.308                   | 641.37113(4)              | 645.67913(4)      |
| C1     | A/MHz | 3652.500            | 3629.192            | 23.308                  | 3673.2148(8)              | 3696.5228(8)      |
|        | B/MHz | 768.288             | 762.763             | 5.525                   | 772.2018(2)               | 777.7268(2)       |
|        | C/MHz | 637.543             | 633.258             | 4.285                   | 640.98518(9)              | 645.27018(9)      |
| C2     | A/MHz | 3613.728            | 3590.751            | 22.977                  | 3634.2544(6)              | 3657.2314(6)      |
|        | B/MHz | 768.888             | 763.342             | 5.546                   | 772.7838(1)               | 778.3298(1)       |
|        | C/MHz | 636.763             | 632.477             | 4.286                   | 640.18763(6)              | 644.37363(6)      |
| C3     | A/MHz | 3614.613            | 3591.567            | 23.046                  | 3635.0126(8)              | 3658.0586(8)      |
|        | B/MHz | 766.591             | 761.060             | 5.531                   | 770.4674(1)               | 775.9984(1)       |
|        | C/MHz | 635.213             | 630.935             | 4.278                   | 638.62055(7)              | 642.89855(7)      |
| C4     | A/MHz | 3652.503            | 3629.18             | 23.323                  | 3673.2194(6)              | 3696.5424(6)      |
|        | B/MHz | 763.977             | 758.470             | 5.507                   | 767.8587(1)               | 773.3657(1)       |
|        | C/MHz | 634.570             | 630.295             | 4.275                   | 637.98926(6)              | 642.26426(6)      |
| C5     | A/MHz | 3614.303            | 3591.149            | 23.154                  | 3633.5063(5)              | 3656.6603(5)      |
|        | B/MHz | 766.154             | 760.600             | 5.554                   | 770.5668(1)               | 776.1208(1)       |
|        | C/MHz | 634.905             | 630.605             | 4.300                   | 638.64200(6)              | 642.94200(6)      |
| C6     | A/MHz | 3614.812            | 3591.591            | 23.221                  | 3635.1455(7)              | 3658.3665(7)      |
|        | B/MHz | 768.888             | 763.337             | 5.551                   | 772.7845(1)               | 778.3355(1)       |
|        | C/MHz | 636.796             | 632.500             | 4.296                   | 640.21584(8)              | 644.51184(8)      |
| C7     | A/MHz | 3652.293            | 3628.976            | 23.317                  | 3673.0162(6)              | 3696.3332(6)      |
|        | B/MHz | 763.201             | 757.731             | 5.470                   | 767.0947(1)               | 772.5647(1)       |
|        | C/MHz | 634.029             | 629.778             | 4.251                   | 637.45558(8)              | 641.70658(8)      |
| C8     | A/MHz | 3615.338            | 3592.508            | 22.83                   | 3636.2955(6)              | 3659.1255(6)      |
|        | B/MHz | 758.510             | 752.969             | 5.541                   | 762.2555(1)               | 767.7965(1)       |
|        | C/MHz | 629.682             | 625.395             | 4.287                   | 633.00903(7)              | 637.29603(7)      |

<sup>a</sup> Values of centrifugal distortion constants were fixed at those of the parent species.

**Table S12.** Theoretical, experimental and semi-experimental rotational constants of all nine isotopologues of AP.

|        |       | $B_e^{\text{theo}}$ | $B_0^{\text{theo}}$ | $\Delta B_{\text{vib}}$ | $B_0^{\text{exp}}$        | $B_e^{\text{SE}}$ |
|--------|-------|---------------------|---------------------|-------------------------|---------------------------|-------------------|
| Normal | A/MHz | 3663.006            | 3640.200            | 22.806                  | 3688.0267(5) <sup>a</sup> | 3710.8327(5)      |
|        | B/MHz | 1210.575            | 1200.512            | 10.063                  | 1215.0491(2)              | 1225.1121(2)      |
|        | C/MHz | 917.072             | 910.402             | 6.670                   | 919.9144(1)               | 926.5844(1)       |
| C1     | A/MHz | 3662.995            | 3640.273            | 22.722                  | 3688.109(1)               | 3710.831(1)       |
|        | B/MHz | 1210.451            | 1200.475            | 9.976                   | 1214.9904(6)              | 1224.9664(6)      |
|        | C/MHz | 917.001             | 910.381             | 6.620                   | 919.8906(4)               | 926.5106(4)       |
| C2     | A/MHz | 3624.670            | 3602.210            | 22.460                  | 3649.1986(5)              | 3671.6586(5)      |
|        | B/MHz | 1209.747            | 1199.752            | 9.995                   | 1214.4274(3)              | 1224.4224(3)      |
|        | C/MHz | 914.188             | 907.569             | 6.619                   | 917.1257(1)               | 923.7447(1)       |
| C3     | A/MHz | 3627.280            | 3604.716            | 22.564                  | 3647.5047(5)              | 3670.0687(5)      |
|        | B/MHz | 1199.895            | 1189.995            | 9.900                   | 1204.9562(2)              | 1214.8562(2)      |
|        | C/MHz | 908.715             | 902.126             | 6.589                   | 911.6077(1)               | 918.1967(1)       |
| C4     | A/MHz | 3662.930            | 3640.166            | 22.764                  | 3688.0297(4)              | 3710.7937(4)      |
|        | B/MHz | 1191.365            | 1181.526            | 9.839                   | 1195.8145(2)              | 1205.6535(2)      |
|        | C/MHz | 906.001             | 899.429             | 6.572                   | 908.8471(1)               | 915.4191(1)       |
| C5     | A/MHz | 3622.901            | 3600.361            | 22.540                  | 3652.138(6)               | 3674.678(6)       |
|        | B/MHz | 1200.495            | 1190.548            | 9.947                   | 1204.3566(3)              | 1214.3036(3)      |
|        | C/MHz | 908.783             | 902.172             | 6.611                   | 911.5537(2)               | 918.1647(2)       |
| C6     | A/MHz | 3624.457            | 3601.821            | 22.636                  | 3649.5745(5)              | 3672.2105(5)      |
|        | B/MHz | 1209.919            | 1199.896            | 10.023                  | 1214.2504(2)              | 1224.2734(2)      |
|        | C/MHz | 914.273             | 907.640             | 6.633                   | 917.0483(1)               | 923.6813(1)       |
| C7     | A/MHz | 3662.726            | 3640.051            | 22.675                  | 3687.869(5)               | 3710.544(5)       |
|        | B/MHz | 1202.229            | 1192.277            | 9.952                   | 1206.7535(2)              | 1216.7055(2)      |
|        | C/MHz | 912.258             | 905.680             | 6.578                   | 915.1419(1)               | 921.7199(1)       |
| C8     | A/MHz | 3626.912            | 3604.647            | 22.265                  | 3652.2545(5)              | 3674.5195(5)      |
|        | B/MHz | 1192.675            | 1182.691            | 9.984                   | 1196.9384(2)              | 1206.9224(2)      |
|        | C/MHz | 904.577             | 897.960             | 6.617                   | 907.3087(1)               | 913.9257(1)       |

<sup>a</sup> Values of centrifugal distortion constants were fixed at those of the parent species.

**Table S13.** Geometries of the carbon skeletons of the 4FAP and AP. ( $r_e$ ,  $r_s$  and  $r_{s \rightarrow e}^{SE}$  structure)

|                  | 4FAP   |                       |                            | AP     |           |                            |
|------------------|--------|-----------------------|----------------------------|--------|-----------|----------------------------|
|                  | $r_e$  | $r_s$                 | $r_{s \rightarrow e}^{SE}$ | $r_e$  | $r_s$     | $r_{s \rightarrow e}^{SE}$ |
| Bond lengths/Å   |        |                       |                            |        |           |                            |
| C1C2             | 1.406  | 1.400(3)              | 1.405(1)                   | 1.405  | 1.350(5)  | 1.399(4)                   |
| C2C3             | 1.387  | 1.398(1) <sup>a</sup> | 1.395(1)                   | 1.396  | 1.405(3)  | 1.384(3)                   |
| C3C4             | 1.388  | 1.370(1)              | 1.368(1)                   | 1.402  | 1.441(1)  | 1.435(1)                   |
| C4C5             | 1.386  | 1.405(1)              | 1.405(1)                   | 1.399  | 1.350(1)  | 1.345(1)                   |
| C5C6             | 1.391  | 1.368(1)              | 1.357(1)                   | 1.399  | 1.399(3)  | 1.386(3)                   |
| C6C1             | 1.400  | 1.387(1)              | 1.390(2)                   | 1.405  | 1.374(5)  | 1.417(4)                   |
| C1C7             | 1.497  | 1.511(2)              | 1.501(1)                   | 1.502  | 1.56(1)   | 1.474(7)                   |
| C7C8             | 1.516  | 1.49(2)               | 1.50(1)                    | 1.516  | 1.49(2)   | 1.51(1)                    |
| Valence angles/° |        |                       |                            |        |           |                            |
| C2C3C4           | 118.53 | 118.7(1)              | 118.7(1)                   | 120.18 | 118.9(9)  | 118.85(9)                  |
| C3C4C5           | 122.34 | 122.65(8)             | 122.47(8)                  | 119.81 | 119.88(5) | 119.98(7)                  |
| C4C5C6           | 118.50 | 117.8(1)              | 118.0(1)                   | 120.14 | 121.2(1)  | 121.2(1)                   |
| C5C6C1           | 120.6  | 121.2(1)              | 121.7(1)                   | 120.18 | 117.3(4)  | 120.8(3)                   |
| C6C1C7           | 122.6  | 122.3(9)              | 123.9(6)                   | 122.2  | 121.5(8)  | 126.1(6)                   |
| C1C7C8           | 118.6  | 120(1)                | 117.8(9)                   | 118.3  | 120(1)    | 118.0(8)                   |
| C2C1C7           | 118.4  | 117.5(9)              | 116.6(6)                   | 118.4  | 113.5(8)  | 116.2(6)                   |

<sup>a</sup> Errors in parenthesis are given in units of the last digit.

**Table S14.** Experimental transition frequencies ( $\nu_{\text{obs}}$ , MHz) and fit deviations ( $\nu_{\text{obs-calc}}$ , kHz) of the isomer I of 4FAP-H<sub>2</sub>O.

| $J'$ | $K_a'$ | $K_c'$ | $J''$ | $K_a''$ | $K_c''$ | State | $\nu_{\text{obs}}/\text{MHz}$ | $\nu_{\text{obs-calc}}/\text{kHz}$ |
|------|--------|--------|-------|---------|---------|-------|-------------------------------|------------------------------------|
| 6    | 0      | 6      | 5     | 0       | 5       | A     | 4900.7910                     | -0.9                               |
| 6    | 0      | 6      | 5     | 0       | 5       | E     | 4900.7910                     | 0.8                                |
| 6    | 1      | 6      | 5     | 1       | 5       | A     | 4773.6264                     | 1.1                                |
| 6    | 1      | 6      | 5     | 1       | 5       | E     | 4773.6264                     | 1.6                                |
| 6    | 1      | 5      | 5     | 1       | 4       | A     | 5058.0187                     | -2.3                               |
| 6    | 1      | 5      | 5     | 1       | 4       | E     | 5058.0187                     | 0.8                                |
| 6    | 2      | 5      | 5     | 2       | 4       | A     | 4917.7793                     | -0.7                               |
| 6    | 2      | 5      | 5     | 2       | 4       | E     | 4917.8081                     | 0.9                                |
| 6    | 2      | 4      | 5     | 2       | 3       | A     | 4937.2960                     | 3.2                                |
| 6    | 2      | 4      | 5     | 2       | 3       | E     | 4937.2618                     | 0.2                                |
| 6    | 3      | 4      | 5     | 3       | 3       | A     | 4923.2568                     | -0.8                               |
| 6    | 3      | 4      | 5     | 3       | 3       | E     | 4923.3574                     | -5.9                               |
| 6    | 3      | 3      | 5     | 3       | 2       | A     | 4923.4931                     | 4.2                                |
| 6    | 3      | 3      | 5     | 3       | 2       | E     | 4923.3816                     | 2.2                                |
| 7    | 0      | 7      | 6     | 0       | 6       | A     | 5709.2457                     | -0.6                               |
| 7    | 0      | 7      | 6     | 0       | 6       | E     | 5709.2457                     | 1.2                                |
| 7    | 1      | 7      | 6     | 1       | 6       | A     | 5567.2255                     | -0.2                               |
| 7    | 1      | 7      | 6     | 1       | 6       | E     | 5567.2255                     | 0.4                                |
| 7    | 1      | 6      | 6     | 1       | 5       | A     | 5898.7687                     | -1.1                               |
| 7    | 1      | 6      | 6     | 1       | 5       | E     | 5898.7687                     | 2.5                                |
| 7    | 2      | 6      | 6     | 2       | 5       | A     | 5735.9898                     | -1.1                               |
| 7    | 2      | 6      | 6     | 2       | 5       | E     | 5736.0027                     | 1.0                                |
| 7    | 2      | 5      | 6     | 2       | 4       | A     | 5767.0956                     | 1.8                                |
| 7    | 2      | 5      | 6     | 2       | 4       | E     | 5767.0743                     | -4.0                               |
| 7    | 3      | 5      | 6     | 3       | 4       | A     | 5744.7346                     | 0.2                                |
| 7    | 3      | 5      | 6     | 3       | 4       | E     | 5744.9595                     | 5.2                                |
| 7    | 3      | 4      | 6     | 3       | 3       | A     | 5745.2550                     | 0.6                                |
| 7    | 3      | 4      | 6     | 3       | 3       | E     | 5745.0375                     | -2.4                               |
| 8    | 0      | 8      | 7     | 0       | 7       | A     | 6513.9990                     | -1.6                               |
| 8    | 0      | 8      | 7     | 0       | 7       | E     | 6513.9990                     | 0.4                                |
| 8    | 1      | 8      | 7     | 1       | 7       | A     | 6359.9553                     | -1.8                               |
| 8    | 1      | 8      | 7     | 1       | 7       | E     | 6359.9553                     | -1.0                               |
| 8    | 1      | 7      | 7     | 1       | 6       | A     | 6738.4198                     | 1.0                                |
| 8    | 1      | 7      | 7     | 1       | 6       | E     | 6738.4141                     | -0.7                               |
| 8    | 2      | 7      | 7     | 2       | 6       | A     | 6553.5494                     | 1.5                                |
| 8    | 2      | 7      | 7     | 2       | 6       | E     | 6553.5494                     | -2.5                               |
| 8    | 2      | 6      | 7     | 2       | 5       | A     | 6599.9373                     | 1.5                                |
| 8    | 2      | 6      | 7     | 2       | 5       | E     | 6599.9234                     | -2.9                               |
| 8    | 3      | 6      | 7     | 3       | 5       | A     | 6566.5870                     | 0.7                                |
| 8    | 3      | 6      | 7     | 3       | 5       | E     | 6566.8981                     | -1.5                               |
| 8    | 3      | 5      | 7     | 3       | 4       | A     | 6567.6264                     | 0.9                                |

---

|    |   |    |    |   |    |   |           |      |
|----|---|----|----|---|----|---|-----------|------|
| 8  | 3 | 5  | 7  | 3 | 4  | E | 6567.3055 | -1.5 |
| 8  | 4 | 5  | 7  | 4 | 4  | A | 6564.2962 | 1.7  |
| 8  | 4 | 5  | 7  | 4 | 4  | E | 6564.2962 | -0.2 |
| 8  | 4 | 4  | 7  | 4 | 3  | A | 6564.3055 | 2.7  |
| 8  | 4 | 4  | 7  | 4 | 3  | E | 6564.2962 | 0.4  |
| 9  | 0 | 9  | 8  | 0 | 8  | A | 7314.6913 | -0.5 |
| 9  | 0 | 9  | 8  | 0 | 8  | E | 7314.6913 | 1.6  |
| 9  | 1 | 9  | 8  | 1 | 8  | A | 7151.7342 | 0.4  |
| 9  | 1 | 9  | 8  | 1 | 8  | E | 7151.7342 | 1.2  |
| 9  | 1 | 8  | 8  | 1 | 7  | A | 7576.7624 | -6.0 |
| 9  | 1 | 8  | 8  | 1 | 7  | E | 7576.7699 | 5.9  |
| 9  | 2 | 8  | 8  | 2 | 7  | A | 7370.3594 | 0.8  |
| 9  | 2 | 8  | 8  | 2 | 7  | E | 7370.3594 | 0.0  |
| 9  | 2 | 7  | 8  | 2 | 6  | A | 7436.0878 | 1.7  |
| 9  | 2 | 7  | 8  | 2 | 6  | E | 7436.0761 | -2.9 |
| 9  | 3 | 7  | 8  | 3 | 6  | A | 7388.8295 | 1.0  |
| 9  | 3 | 7  | 8  | 3 | 6  | E | 7389.1508 | -2.4 |
| 9  | 3 | 6  | 8  | 3 | 5  | A | 7390.7324 | 1.3  |
| 9  | 3 | 6  | 8  | 3 | 5  | E | 7390.4005 | 0.1  |
| 9  | 4 | 6  | 8  | 4 | 5  | A | 7385.7758 | 4.3  |
| 9  | 4 | 6  | 8  | 4 | 5  | E | 7385.7758 | -3.2 |
| 9  | 4 | 5  | 8  | 4 | 4  | A | 7385.7984 | 6.9  |
| 9  | 4 | 5  | 8  | 4 | 4  | E | 7385.7758 | -2.5 |
| 10 | 0 | 10 | 9  | 0 | 9  | A | 8111.0648 | -2.3 |
| 10 | 0 | 10 | 9  | 0 | 9  | E | 8111.0648 | -0.1 |
| 10 | 1 | 10 | 9  | 1 | 9  | A | 7942.4842 | -0.5 |
| 10 | 1 | 10 | 9  | 1 | 9  | E | 7942.4842 | 0.4  |
| 10 | 1 | 9  | 9  | 1 | 8  | A | 8413.6027 | 0.9  |
| 10 | 1 | 9  | 9  | 1 | 8  | E | 8413.5947 | -2.3 |
| 10 | 2 | 9  | 9  | 2 | 8  | A | 8186.3319 | 0.3  |
| 10 | 2 | 9  | 9  | 2 | 8  | E | 8186.3319 | 1.2  |
| 10 | 2 | 8  | 9  | 2 | 7  | A | 8275.7017 | 1.4  |
| 10 | 2 | 8  | 9  | 2 | 7  | E | 8275.6914 | -2.8 |
| 10 | 3 | 8  | 9  | 3 | 7  | A | 8211.4616 | 0.2  |
| 10 | 3 | 8  | 9  | 3 | 7  | E | 8211.6939 | -2.8 |
| 10 | 3 | 7  | 9  | 3 | 6  | A | 8214.7187 | 1.3  |
| 10 | 3 | 7  | 9  | 3 | 6  | E | 8214.4745 | -0.9 |
| 10 | 4 | 7  | 9  | 4 | 6  | A | 8207.5702 | -6.8 |
| 10 | 4 | 7  | 9  | 4 | 6  | E | 8207.5937 | -2.0 |
| 10 | 4 | 6  | 9  | 4 | 5  | A | 8207.6244 | 4.0  |
| 10 | 4 | 6  | 9  | 4 | 5  | E | 8207.5937 | -1.5 |
| 11 | 0 | 11 | 10 | 0 | 10 | A | 8903.0099 | -1.3 |
| 11 | 0 | 11 | 10 | 0 | 10 | E | 8903.0099 | 0.9  |
| 11 | 1 | 11 | 10 | 1 | 10 | A | 8732.1534 | -0.2 |

---

---

|    |   |    |    |   |    |   |            |      |
|----|---|----|----|---|----|---|------------|------|
| 11 | 1 | 11 | 10 | 1 | 10 | E | 8732.1534  | 0.7  |
| 11 | 1 | 10 | 10 | 1 | 9  | A | 9248.6849  | 1.3  |
| 11 | 1 | 10 | 10 | 1 | 9  | E | 9248.6762  | -2.1 |
| 11 | 2 | 10 | 10 | 2 | 9  | A | 9001.3773  | 0.4  |
| 11 | 2 | 10 | 10 | 2 | 9  | E | 9001.3773  | 2.4  |
| 11 | 2 | 9  | 10 | 2 | 8  | A | 9118.7971  | 1.8  |
| 11 | 2 | 9  | 10 | 2 | 8  | E | 9118.7851  | -4.3 |
| 11 | 3 | 9  | 10 | 3 | 8  | A | 9034.4707  | 0.0  |
| 11 | 3 | 9  | 10 | 3 | 8  | E | 9034.6069  | -2.3 |
| 12 | 0 | 12 | 11 | 0 | 11 | A | 9690.5647  | -0.8 |
| 12 | 0 | 12 | 11 | 0 | 11 | E | 9690.5647  | 1.3  |
| 12 | 1 | 12 | 11 | 1 | 11 | A | 9520.7005  | 0.3  |
| 12 | 1 | 12 | 11 | 1 | 11 | E | 9520.7005  | 1.2  |
| 12 | 1 | 11 | 11 | 1 | 10 | A | 10081.7601 | 2.3  |
| 12 | 1 | 11 | 11 | 1 | 10 | E | 10081.7496 | -2.6 |
| 12 | 2 | 11 | 11 | 2 | 10 | A | 9815.4062  | 0.2  |
| 12 | 2 | 11 | 11 | 2 | 10 | E | 9815.4062  | 2.9  |
| 13 | 0 | 13 | 12 | 0 | 12 | A | 10473.9339 | -1.5 |
| 13 | 0 | 13 | 12 | 0 | 12 | E | 10473.9339 | 0.6  |
| 13 | 1 | 13 | 12 | 1 | 12 | A | 10308.0969 | -3.1 |
| 13 | 1 | 13 | 12 | 1 | 12 | E | 10308.0969 | -2.2 |
| 13 | 1 | 12 | 12 | 1 | 11 | A | 10912.5519 | 4.1  |
| 13 | 1 | 12 | 12 | 1 | 11 | E | 10912.5368 | -5.1 |
| 13 | 2 | 12 | 12 | 2 | 11 | A | 10628.3343 | 1.6  |
| 13 | 2 | 12 | 12 | 2 | 11 | E | 10628.3289 | -0.6 |
| 13 | 2 | 11 | 12 | 2 | 10 | A | 10814.6877 | -2.1 |
| 13 | 2 | 11 | 12 | 2 | 10 | E | 10814.6772 | -6.1 |
| 14 | 0 | 14 | 13 | 0 | 13 | A | 11253.4776 | -1.1 |
| 14 | 0 | 14 | 13 | 0 | 13 | E | 11253.4776 | 1.0  |
| 14 | 1 | 14 | 13 | 1 | 13 | A | 11094.3459 | 1.7  |
| 14 | 1 | 14 | 13 | 1 | 13 | E | 11094.3459 | 2.5  |
| 14 | 1 | 13 | 13 | 1 | 12 | A | 11740.7566 | -0.1 |
| 14 | 1 | 13 | 13 | 1 | 12 | E | 11740.7566 | 6.1  |
| 15 | 0 | 15 | 14 | 0 | 14 | A | 12029.6743 | -2.9 |
| 15 | 0 | 15 | 14 | 0 | 14 | E | 12029.6743 | -0.9 |
| 15 | 1 | 15 | 14 | 1 | 14 | A | 11879.4411 | 1.9  |
| 15 | 1 | 15 | 14 | 1 | 14 | E | 11879.4411 | 2.7  |
| 15 | 1 | 14 | 14 | 1 | 13 | A | 12566.0685 | -0.5 |
| 15 | 1 | 14 | 14 | 1 | 13 | E | 12566.0586 | -3.9 |
| 16 | 0 | 16 | 15 | 0 | 15 | A | 12803.0932 | -1.2 |
| 16 | 0 | 16 | 15 | 0 | 15 | E | 12803.0932 | 0.7  |
| 16 | 1 | 16 | 15 | 1 | 15 | A | 12663.4052 | 0.1  |
| 16 | 1 | 16 | 15 | 1 | 15 | E | 12663.4052 | 0.8  |
| 17 | 0 | 17 | 16 | 0 | 16 | A | 13574.3235 | -2.4 |

---



---

|    |   |    |    |   |    |   |            |      |
|----|---|----|----|---|----|---|------------|------|
| 17 | 0 | 17 | 16 | 0 | 16 | E | 13574.3235 | -0.5 |
| 18 | 0 | 18 | 17 | 0 | 17 | A | 14343.9513 | -0.7 |
| 18 | 0 | 18 | 17 | 0 | 17 | E | 14343.9513 | 1.2  |
| 19 | 0 | 19 | 18 | 0 | 18 | A | 15112.4990 | -0.9 |
| 19 | 0 | 19 | 18 | 0 | 18 | E | 15112.4990 | 1.2  |
| 20 | 0 | 20 | 19 | 0 | 19 | A | 15880.4170 | -1.3 |
| 20 | 0 | 20 | 19 | 0 | 19 | E | 15880.4170 | 0.9  |
| 2  | 2 | 1  | 1  | 1 | 0  | A | 10657.7521 | 3.5  |
| 2  | 2 | 1  | 1  | 1 | 0  | E | 10656.8824 | 1.7  |
| 2  | 2 | 0  | 1  | 1 | 1  | A | 10705.7469 | 0.3  |
| 2  | 2 | 0  | 1  | 1 | 1  | E | 10706.5457 | 1.5  |
| 3  | 2 | 2  | 2  | 1 | 1  | A | 11430.3586 | -1.2 |
| 3  | 2 | 2  | 2  | 1 | 1  | E | 11429.9610 | 0.7  |
| 4  | 1 | 4  | 3  | 0 | 3  | A | 6058.1634  | 5.5  |
| 4  | 1 | 4  | 3  | 0 | 3  | E | 6058.1453  | -1.2 |
| 4  | 2 | 3  | 3  | 1 | 2  | A | 12179.1654 | -1.6 |
| 4  | 2 | 3  | 3  | 1 | 2  | E | 12178.9969 | -0.1 |
| 5  | 1 | 5  | 4  | 0 | 4  | A | 6762.8056  | 5.6  |
| 5  | 1 | 5  | 4  | 0 | 4  | E | 6762.7884  | -1.0 |
| 5  | 2 | 4  | 4  | 1 | 3  | A | 12904.2288 | 3.9  |
| 5  | 2 | 4  | 4  | 1 | 3  | E | 12904.1307 | -1.1 |
| 6  | 1 | 6  | 5  | 0 | 5  | A | 7447.3485  | 4.2  |
| 6  | 1 | 6  | 5  | 0 | 5  | E | 7447.3347  | 0.1  |
| 6  | 2 | 5  | 5  | 1 | 4  | A | 13605.6462 | -1.6 |
| 6  | 2 | 5  | 5  | 1 | 4  | E | 13605.5860 | 1.3  |
| 6  | 2 | 4  | 5  | 1 | 5  | A | 14356.1739 | -1.3 |
| 6  | 2 | 4  | 5  | 1 | 5  | E | 14356.1739 | -1.1 |
| 7  | 1 | 7  | 6  | 0 | 6  | A | 8113.7831  | 4.9  |
| 7  | 1 | 7  | 6  | 0 | 6  | E | 8113.7643  | -5.2 |
| 7  | 2 | 6  | 6  | 1 | 5  | A | 14283.6208 | 3.1  |
| 7  | 2 | 6  | 6  | 1 | 5  | E | 14283.5708 | 2.3  |
| 8  | 1 | 8  | 7  | 0 | 7  | A | 8764.4814  | -7.5 |
| 8  | 1 | 8  | 7  | 0 | 7  | E | 8764.4814  | 0.1  |
| 8  | 2 | 7  | 7  | 1 | 6  | A | 14938.3949 | -0.9 |
| 8  | 2 | 7  | 7  | 1 | 6  | E | 14938.3569 | 2.7  |
| 9  | 0 | 9  | 8  | 1 | 8  | A | 5064.2068  | 3.4  |
| 9  | 0 | 9  | 8  | 1 | 8  | E | 5064.2068  | -0.1 |
| 9  | 1 | 9  | 8  | 0 | 8  | A | 9402.2156  | -6.6 |
| 9  | 1 | 9  | 8  | 0 | 8  | E | 9402.2156  | -0.1 |
| 9  | 2 | 8  | 8  | 1 | 7  | A | 15570.3371 | 1.5  |
| 9  | 2 | 8  | 8  | 1 | 7  | E | 15570.2978 | -1.0 |
| 10 | 0 | 10 | 9  | 1 | 9  | A | 6023.5374  | 0.7  |
| 10 | 0 | 10 | 9  | 1 | 9  | E | 6023.5374  | -1.5 |
| 10 | 1 | 10 | 9  | 0 | 9  | A | 10030.0086 | -6.5 |

---

---

|    |   |    |    |   |    |   |            |      |
|----|---|----|----|---|----|---|------------|------|
| 10 | 1 | 10 | 9  | 0 | 9  | E | 10030.0086 | -1.3 |
| 10 | 2 | 9  | 9  | 1 | 8  | A | 16179.9014 | 2.6  |
| 10 | 2 | 9  | 9  | 1 | 8  | E | 16179.8668 | 1.3  |
| 11 | 0 | 11 | 10 | 1 | 10 | A | 6984.0642  | 1.0  |
| 11 | 0 | 11 | 10 | 1 | 10 | E | 6984.0642  | 0.2  |
| 11 | 1 | 11 | 10 | 0 | 10 | A | 10651.0994 | -2.2 |
| 11 | 1 | 11 | 10 | 0 | 10 | E | 10651.0994 | 1.8  |
| 12 | 0 | 12 | 11 | 1 | 11 | A | 7942.4719  | -3.2 |
| 12 | 0 | 12 | 11 | 1 | 11 | E | 7942.4719  | -2.8 |
| 12 | 1 | 12 | 11 | 0 | 11 | A | 11268.7924 | 1.7  |
| 12 | 1 | 12 | 11 | 0 | 11 | E | 11268.7872 | -0.7 |
| 13 | 0 | 13 | 12 | 1 | 12 | A | 8895.7097  | -0.5 |
| 13 | 0 | 13 | 12 | 1 | 12 | E | 8895.7097  | 1.0  |
| 13 | 1 | 13 | 12 | 0 | 12 | A | 11886.3248 | -0.4 |
| 13 | 1 | 13 | 12 | 0 | 12 | E | 11886.3248 | 1.2  |
| 14 | 0 | 14 | 13 | 1 | 13 | A | 9841.0891  | 0.2  |
| 14 | 0 | 14 | 13 | 1 | 13 | E | 9841.0891  | 2.8  |
| 14 | 1 | 14 | 13 | 0 | 13 | A | 12506.7340 | 0.0  |
| 14 | 1 | 14 | 13 | 0 | 13 | E | 12506.7340 | 0.3  |
| 15 | 0 | 15 | 14 | 1 | 14 | A | 10776.4193 | -2.6 |
| 15 | 0 | 15 | 14 | 1 | 14 | E | 10776.4284 | 0.2  |
| 15 | 1 | 15 | 14 | 0 | 14 | A | 13132.6999 | 5.4  |
| 15 | 1 | 15 | 14 | 0 | 14 | E | 13132.6910 | -4.4 |
| 3  | 3 | 0  | 2  | 2 | 0  | A | 17528.7682 | -5.6 |
| 3  | 3 | 0  | 2  | 2 | 0  | E | 17529.4935 | 1.6  |
| 3  | 3 | 1  | 2  | 2 | 1  | A | 17529.3344 | 4.7  |
| 3  | 3 | 1  | 2  | 2 | 1  | E | 17528.4926 | -2.1 |

---

**Table S15.** Experimental transition frequencies ( $\nu_{\text{obs}}$ , MHz) and fit deviations ( $\nu_{\text{obs-calc}}$ , kHz) of the Isomer I of 4FAP-H<sub>2</sub><sup>18</sup>O.

| $J'$ | $K_a'$ | $K_c'$ | $J''$ | $K_a''$ | $K_c''$ | State | $\nu_{\text{obs}}/\text{MHz}$ | $\nu_{\text{obs-calc}}/\text{kHz}$ |
|------|--------|--------|-------|---------|---------|-------|-------------------------------|------------------------------------|
| 7    | 0      | 7      | 6     | 0       | 6       | A     | 5486.9787                     | -0.3                               |
| 7    | 0      | 7      | 6     | 0       | 6       | E     | 5486.9787                     | 1.4                                |
| 7    | 1      | 7      | 6     | 1       | 6       | A     | 5353.9426                     | -0.8                               |
| 7    | 1      | 7      | 6     | 1       | 6       | E     | 5353.9426                     | -0.3                               |
| 7    | 1      | 6      | 6     | 1       | 5       | A     | 5660.5619                     | -4.2                               |
| 7    | 1      | 6      | 6     | 1       | 5       | E     | 5660.5619                     | -0.7                               |
| 7    | 2      | 6      | 6     | 2       | 5       | A     | 5509.8027                     | -1.8                               |
| 7    | 2      | 6      | 6     | 2       | 5       | E     | 5509.8185                     | 0.8                                |
| 7    | 2      | 5      | 6     | 2       | 4       | A     | 5536.3495                     | 3.2                                |
| 7    | 2      | 5      | 6     | 2       | 4       | E     | 5536.3266                     | -2.1                               |
| 8    | 0      | 8      | 7     | 0       | 7       | A     | 6261.5388                     | 0.2                                |
| 8    | 0      | 8      | 7     | 0       | 7       | E     | 6261.5388                     | 2.0                                |
| 8    | 1      | 8      | 7     | 1       | 7       | A     | 6116.5724                     | -0.4                               |
| 8    | 1      | 8      | 7     | 1       | 7       | E     | 6116.5724                     | 0.1                                |
| 8    | 1      | 7      | 7     | 1       | 6       | A     | 6466.6471                     | -1.1                               |
| 8    | 1      | 7      | 7     | 1       | 6       | E     | 6466.6471                     | 2.8                                |
| 8    | 2      | 7      | 7     | 2       | 6       | A     | 6295.3265                     | 2.2                                |
| 8    | 2      | 7      | 7     | 2       | 6       | E     | 6295.3265                     | -3.1                               |
| 8    | 2      | 6      | 7     | 2       | 5       | A     | 6334.9453                     | 2.3                                |
| 8    | 2      | 6      | 7     | 2       | 5       | E     | 6334.9299                     | -2.7                               |
| 9    | 0      | 9      | 8     | 0       | 8       | A     | 7032.5841                     | 0.1                                |
| 9    | 0      | 9      | 8     | 0       | 8       | E     | 7032.5841                     | 1.9                                |
| 9    | 1      | 9      | 8     | 1       | 8       | A     | 6878.3792                     | 1.6                                |
| 9    | 1      | 9      | 8     | 1       | 8       | E     | 6878.3792                     | 2.1                                |
| 9    | 1      | 8      | 8     | 1       | 7       | A     | 7271.6321                     | -2.2                               |
| 9    | 1      | 8      | 8     | 1       | 7       | E     | 7271.6321                     | 2.1                                |
| 9    | 2      | 8      | 8     | 2       | 7       | A     | 7080.2084                     | 1.0                                |
| 9    | 2      | 8      | 8     | 2       | 7       | E     | 7080.2084                     | -0.6                               |
| 9    | 2      | 7      | 8     | 2       | 6       | A     | 7136.4121                     | 1.7                                |
| 9    | 2      | 7      | 8     | 2       | 6       | E     | 7136.4002                     | -2.7                               |
| 10   | 0      | 10     | 9     | 0       | 9       | A     | 7799.8647                     | -0.2                               |
| 10   | 0      | 10     | 9     | 0       | 9       | E     | 7799.8647                     | 1.7                                |
| 10   | 1      | 10     | 9     | 1       | 9       | A     | 7639.2927                     | -0.1                               |
| 10   | 1      | 10     | 9     | 1       | 9       | E     | 7639.2927                     | 0.5                                |
| 10   | 1      | 9      | 9     | 1       | 8       | A     | 8075.3397                     | -5.2                               |
| 10   | 1      | 9      | 9     | 1       | 8       | E     | 8075.3397                     | -0.5                               |
| 10   | 2      | 9      | 9     | 2       | 8       | A     | 7864.3773                     | 1.8                                |
| 10   | 2      | 9      | 9     | 2       | 8       | E     | 7864.3773                     | 2.2                                |
| 10   | 2      | 8      | 9     | 2       | 7       | A     | 7940.9113                     | -5.1                               |
| 10   | 2      | 8      | 9     | 2       | 7       | E     | 7940.9113                     | 1.2                                |
| 11   | 0      | 11     | 10    | 0       | 10      | A     | 8563.2358                     | -0.1                               |

---

|    |   |    |    |   |    |   |            |      |
|----|---|----|----|---|----|---|------------|------|
| 11 | 0 | 11 | 10 | 0 | 10 | E | 8563.2358  | 1.7  |
| 11 | 1 | 11 | 10 | 1 | 10 | A | 8399.2659  | 0.4  |
| 11 | 1 | 11 | 10 | 1 | 10 | E | 8399.2659  | 1.0  |
| 11 | 1 | 10 | 10 | 1 | 9  | A | 8877.5871  | 1.9  |
| 11 | 1 | 10 | 10 | 1 | 9  | E | 8877.5794  | -0.8 |
| 11 | 2 | 10 | 10 | 2 | 9  | A | 8647.7519  | 0.5  |
| 11 | 2 | 10 | 10 | 2 | 9  | E | 8647.7519  | 2.0  |
| 11 | 2 | 9  | 10 | 2 | 8  | A | 8748.5225  | -0.2 |
| 11 | 2 | 9  | 10 | 2 | 8  | E | 8748.5135  | -3.3 |
| 12 | 0 | 12 | 11 | 0 | 11 | A | 9322.6729  | -2.1 |
| 12 | 0 | 12 | 11 | 0 | 11 | E | 9322.6729  | -0.3 |
| 12 | 1 | 12 | 11 | 1 | 11 | A | 9158.2553  | -0.4 |
| 12 | 1 | 12 | 11 | 1 | 11 | E | 9158.2553  | 0.2  |
| 12 | 1 | 11 | 11 | 1 | 10 | A | 9678.1470  | 2.4  |
| 12 | 1 | 11 | 11 | 1 | 10 | E | 9678.1371  | -2.1 |
| 13 | 0 | 13 | 12 | 0 | 12 | A | 10078.2919 | -1.3 |
| 13 | 0 | 13 | 12 | 0 | 12 | E | 10078.2919 | 0.4  |
| 13 | 1 | 13 | 12 | 1 | 12 | A | 9916.2375  | 1.2  |
| 13 | 1 | 13 | 12 | 1 | 12 | E | 9916.2375  | 1.7  |
| 13 | 1 | 12 | 12 | 1 | 11 | A | 10476.7963 | 0.9  |
| 13 | 1 | 12 | 12 | 1 | 11 | E | 10476.7876 | -2.0 |
| 14 | 0 | 14 | 13 | 0 | 13 | A | 10830.3344 | 1.3  |
| 14 | 0 | 14 | 13 | 0 | 13 | E | 10830.3344 | 2.9  |
| 15 | 0 | 15 | 14 | 0 | 14 | A | 11579.1527 | 0.0  |
| 15 | 0 | 15 | 14 | 0 | 14 | E | 11579.1527 | 1.4  |
| 16 | 0 | 16 | 15 | 0 | 15 | A | 12325.1960 | -1.5 |
| 16 | 0 | 16 | 15 | 0 | 15 | E | 12325.1960 | -0.1 |
| 2  | 2 | 1  | 1  | 1 | 0  | A | 10622.4206 | 2.7  |
| 2  | 2 | 1  | 1  | 1 | 0  | E | 10621.5264 | 5.5  |
| 2  | 2 | 0  | 1  | 1 | 1  | A | 10666.7643 | 7.1  |
| 2  | 2 | 0  | 1  | 1 | 1  | E | 10667.5838 | -0.5 |
| 3  | 2 | 2  | 2  | 1 | 1  | A | 11366.1978 | -3.3 |
| 3  | 2 | 2  | 2  | 1 | 1  | E | 11365.7597 | 3.7  |
| 6  | 1 | 6  | 5  | 0 | 5  | A | 7298.0198  | 4.6  |
| 6  | 1 | 6  | 5  | 0 | 5  | E | 7298.0061  | 0.2  |
| 7  | 1 | 7  | 6  | 0 | 6  | A | 7942.7259  | 5.1  |
| 7  | 1 | 7  | 6  | 0 | 6  | E | 7942.7135  | 0.9  |
| 8  | 1 | 8  | 7  | 0 | 7  | A | 8572.3088  | -5.8 |
| 8  | 1 | 8  | 7  | 0 | 7  | E | 8572.3088  | 1.2  |
| 9  | 1 | 9  | 8  | 0 | 8  | A | 9189.1488  | -4.8 |
| 9  | 1 | 9  | 8  | 0 | 8  | E | 9189.1488  | 0.9  |
| 10 | 1 | 10 | 9  | 0 | 9  | A | 9795.8581  | -4.2 |
| 10 | 1 | 10 | 9  | 0 | 9  | E | 9795.8581  | 0.2  |
| 11 | 0 | 11 | 10 | 1 | 10 | A | 6567.2386  | 0.1  |

---

---

|    |   |    |    |   |    |   |            |      |
|----|---|----|----|---|----|---|------------|------|
| 11 | 0 | 11 | 10 | 1 | 10 | E | 6567.2386  | -0.6 |
| 11 | 1 | 11 | 10 | 0 | 10 | A | 10395.2612 | -1.7 |
| 11 | 1 | 11 | 10 | 0 | 10 | E | 10395.2612 | 1.4  |
| 12 | 0 | 12 | 11 | 1 | 11 | A | 7490.6457  | -2.3 |
| 12 | 0 | 12 | 11 | 1 | 11 | E | 7490.6457  | -1.7 |
| 12 | 1 | 12 | 11 | 0 | 11 | A | 10990.2806 | -2.0 |
| 12 | 1 | 12 | 11 | 0 | 11 | E | 10990.2806 | -0.3 |
| 13 | 0 | 13 | 12 | 1 | 12 | A | 8410.6849  | -0.6 |
| 13 | 0 | 13 | 12 | 1 | 12 | E | 8410.6849  | 1.1  |
| 13 | 1 | 13 | 12 | 0 | 12 | A | 11583.8432 | -0.7 |
| 13 | 1 | 13 | 12 | 0 | 12 | E | 11583.8432 | -0.3 |
| 14 | 0 | 14 | 13 | 1 | 13 | A | 9324.7817  | -0.7 |
| 14 | 0 | 14 | 13 | 1 | 13 | E | 9324.7817  | 2.2  |
| 14 | 1 | 14 | 13 | 0 | 13 | A | 12178.7447 | 0.9  |
| 14 | 1 | 14 | 13 | 0 | 13 | E | 12178.7447 | 0.0  |
| 3  | 3 | 0  | 2  | 2 | 0  | A | 17477.7382 | -3.1 |
| 3  | 3 | 0  | 2  | 2 | 0  | E | 17478.4181 | -9.0 |
| 3  | 3 | 1  | 2  | 2 | 1  | A | 17478.2199 | 4.5  |
| 3  | 3 | 1  | 2  | 2 | 1  | E | 17477.4120 | -1.3 |

---

**Table S16.** Experimental transition frequencies ( $\nu_{\text{obs}}$ , MHz) and fit deviations ( $\nu_{\text{obs-calc}}$ , kHz) of the Isomer I of 4FAP-HOD.

| $J$ | $K_a'$ | $K_c'$ | $J''$ | $K_a''$ | $K_c''$ | State | $\nu_{\text{obs}}/\text{MHz}$ | $\nu_{\text{obs-calc}}/\text{kHz}$ |
|-----|--------|--------|-------|---------|---------|-------|-------------------------------|------------------------------------|
| 7   | 0      | 7      | 6     | 0       | 6       | A     | 5568.8083                     | -1.1                               |
| 7   | 0      | 7      | 6     | 0       | 6       | E     | 5568.8083                     | 0.6                                |
| 7   | 1      | 7      | 6     | 1       | 6       | A     | 5431.9612                     | -3.9                               |
| 7   | 1      | 7      | 6     | 1       | 6       | E     | 5431.9612                     | -3.3                               |
| 7   | 1      | 6      | 6     | 1       | 5       | A     | 5749.4620                     | -1.2                               |
| 7   | 1      | 6      | 6     | 1       | 5       | E     | 5749.4562                     | -3.5                               |
| 8   | 0      | 8      | 7     | 0       | 7       | A     | 6354.3276                     | -1.4                               |
| 8   | 0      | 8      | 7     | 0       | 7       | E     | 6354.3276                     | 0.4                                |
| 8   | 1      | 8      | 7     | 1       | 7       | A     | 6205.5672                     | -1.4                               |
| 8   | 1      | 8      | 7     | 1       | 7       | E     | 6205.5672                     | -0.8                               |
| 8   | 1      | 7      | 7     | 1       | 6       | A     | 6568.0298                     | 1.7                                |
| 8   | 1      | 7      | 7     | 1       | 6       | E     | 6568.0197                     | -4.4                               |
| 9   | 0      | 9      | 8     | 0       | 8       | A     | 7136.0705                     | -6.9                               |
| 9   | 0      | 9      | 8     | 0       | 8       | E     | 7136.0705                     | -4.9                               |
| 9   | 1      | 9      | 8     | 1       | 8       | A     | 6978.2834                     | -3.4                               |
| 9   | 1      | 9      | 8     | 1       | 8       | E     | 6978.2834                     | -2.7                               |
| 9   | 1      | 8      | 8     | 1       | 7       | A     | 7385.4028                     | 1.3                                |
| 9   | 1      | 8      | 8     | 1       | 7       | E     | 7385.3949                     | -2.3                               |
| 10  | 0      | 10     | 9     | 0       | 9       | A     | 7913.8013                     | -1.9                               |
| 10  | 0      | 10     | 9     | 0       | 9       | E     | 7913.8013                     | 0.1                                |
| 10  | 1      | 10     | 9     | 1       | 9       | A     | 7750.0485                     | -3.1                               |
| 10  | 1      | 10     | 9     | 1       | 9       | E     | 7750.0485                     | -2.4                               |
| 10  | 1      | 9      | 9     | 1       | 8       | A     | 8201.3876                     | 1.2                                |
| 10  | 1      | 9      | 9     | 1       | 8       | E     | 8201.3806                     | -1.1                               |
| 11  | 0      | 11     | 10    | 0       | 10      | A     | 8687.3762                     | 0.7                                |
| 11  | 0      | 11     | 10    | 0       | 10      | E     | 8687.3866                     | 3.0                                |
| 11  | 1      | 11     | 10    | 1       | 10      | A     | 8520.8045                     | -4.4                               |
| 11  | 1      | 11     | 10    | 1       | 10      | E     | 8520.8045                     | -3.7                               |
| 11  | 1      | 10     | 10    | 1       | 9       | A     | 9015.7760                     | 7.1                                |
| 11  | 1      | 10     | 10    | 1       | 9       | E     | 9015.7648                     | 1.0                                |
| 12  | 0      | 12     | 11    | 0       | 11      | A     | 9456.8008                     | -2.2                               |
| 12  | 0      | 12     | 11    | 0       | 11      | E     | 9456.8008                     | -0.3                               |
| 12  | 1      | 12     | 11    | 1       | 11      | A     | 9290.5184                     | -0.1                               |
| 12  | 1      | 12     | 11    | 1       | 11      | E     | 9290.5184                     | 0.6                                |
| 12  | 1      | 11     | 11    | 1       | 10      | A     | 9828.3225                     | 5.5                                |
| 12  | 1      | 11     | 11    | 1       | 10      | E     | 9828.3086                     | -2.9                               |
| 13  | 0      | 13     | 12    | 0       | 12      | A     | 10222.2392                    | -2.9                               |
| 13  | 0      | 13     | 12    | 0       | 12      | E     | 10222.2392                    | -1.1                               |
| 13  | 1      | 13     | 12    | 1       | 12      | A     | 10059.1571                    | 2.4                                |
| 13  | 1      | 13     | 12    | 1       | 12      | E     | 10059.1496                    | -4.4                               |
| 13  | 1      | 12     | 12    | 1       | 11      | A     | 10638.7781                    | -1.8                               |

---

|    |   |    |    |   |    |   |            |      |
|----|---|----|----|---|----|---|------------|------|
| 13 | 1 | 12 | 12 | 1 | 11 | E | 10638.7781 | 4.1  |
| 14 | 0 | 14 | 13 | 0 | 13 | A | 10983.9934 | 2.2  |
| 14 | 0 | 14 | 13 | 0 | 13 | E | 10983.9934 | 4.0  |
| 15 | 0 | 15 | 14 | 0 | 14 | A | 11742.4739 | 5.3  |
| 15 | 0 | 15 | 14 | 0 | 14 | E | 11742.4739 | 6.9  |
| 16 | 0 | 16 | 15 | 0 | 15 | A | 12498.1760 | -1.5 |
| 16 | 0 | 16 | 15 | 0 | 15 | E | 12498.1760 | 0.1  |
| 7  | 1 | 7  | 6  | 0 | 6  | A | 7981.9676  | -3.9 |
| 7  | 1 | 7  | 6  | 0 | 6  | E | 7981.9600  | -3.3 |
| 8  | 1 | 8  | 7  | 0 | 7  | A | 8618.7272  | -3.5 |
| 8  | 1 | 8  | 7  | 0 | 7  | E | 8618.7272  | 3.5  |
| 9  | 1 | 9  | 8  | 0 | 8  | A | 9242.6851  | -3.3 |
| 9  | 1 | 9  | 8  | 0 | 8  | E | 9242.6851  | 2.5  |
| 10 | 1 | 10 | 9  | 0 | 9  | A | 9856.6640  | 1.3  |
| 10 | 1 | 10 | 9  | 0 | 9  | E | 9856.6640  | 5.9  |

---

**Table S17.** Experimental transition frequencies ( $\nu_{\text{obs}}$ , MHz) and fit deviations ( $\nu_{\text{obs-calc}}$ , kHz) of the Isomer I of 4FAP-DOH.

| $J'$ | $K_a'$ | $K_c'$ | $J''$ | $K_a''$ | $K_c''$ | State | $\nu_{\text{obs}}/\text{MHz}$ | $\nu_{\text{obs-calc}}/\text{kHz}$ |
|------|--------|--------|-------|---------|---------|-------|-------------------------------|------------------------------------|
| 7    | 0      | 7      | 6     | 0       | 6       | A     | 5634.5191                     | -1.5                               |
| 7    | 0      | 7      | 6     | 0       | 6       | E     | 5634.5191                     | 0.3                                |
| 7    | 1      | 7      | 6     | 1       | 6       | A     | 5495.2194                     | 0.8                                |
| 7    | 1      | 7      | 6     | 1       | 6       | E     | 5495.2194                     | 1.4                                |
| 7    | 1      | 6      | 6     | 1       | 5       | A     | 5819.3471                     | -2.7                               |
| 7    | 1      | 6      | 6     | 1       | 5       | E     | 5819.3471                     | 0.8                                |
| 8    | 0      | 8      | 7     | 0       | 7       | A     | 6429.0403                     | -2.0                               |
| 8    | 0      | 8      | 7     | 0       | 7       | E     | 6429.0403                     | 0.0                                |
| 8    | 1      | 8      | 7     | 1       | 7       | A     | 6277.7664                     | -1.1                               |
| 8    | 1      | 8      | 7     | 1       | 7       | E     | 6277.7664                     | -0.4                               |
| 8    | 1      | 7      | 7     | 1       | 6       | A     | 6647.7779                     | -6.7                               |
| 8    | 1      | 7      | 7     | 1       | 6       | E     | 6647.7664                     | -4.2                               |
| 9    | 0      | 9      | 8     | 0       | 8       | A     | 7219.6542                     | -2.2                               |
| 9    | 0      | 9      | 8     | 0       | 8       | E     | 7219.6542                     | -0.1                               |
| 9    | 1      | 9      | 8     | 1       | 8       | A     | 7059.3988                     | 0.1                                |
| 9    | 1      | 9      | 8     | 1       | 8       | E     | 7059.3988                     | 0.8                                |
| 9    | 1      | 8      | 8     | 1       | 7       | A     | 7474.9801                     | 2.3                                |
| 9    | 1      | 8      | 8     | 1       | 7       | E     | 7474.9739                     | 0.4                                |
| 10   | 0      | 10     | 9     | 0       | 9       | A     | 8006.1086                     | -2.0                               |
| 10   | 0      | 10     | 9     | 0       | 9       | E     | 8006.1086                     | 0.1                                |
| 10   | 1      | 10     | 9     | 1       | 9       | A     | 7840.0420                     | -0.8                               |
| 10   | 1      | 10     | 9     | 1       | 9       | E     | 7840.0420                     | 0.0                                |
| 10   | 1      | 9      | 9     | 1       | 8       | A     | 8300.7334                     | 0.0                                |
| 10   | 1      | 9      | 9     | 1       | 8       | E     | 8300.7201                     | 1.5                                |
| 11   | 0      | 11     | 10    | 0       | 10      | A     | 8788.2801                     | -0.6                               |
| 11   | 0      | 11     | 10    | 0       | 10      | E     | 8788.2801                     | 1.4                                |
| 11   | 1      | 11     | 10    | 1       | 10      | A     | 8619.6452                     | 0.7                                |
| 11   | 1      | 11     | 10    | 1       | 10      | E     | 8619.6452                     | 1.5                                |
| 11   | 1      | 10     | 10    | 1       | 9       | A     | 9124.8056                     | 8.2                                |
| 11   | 1      | 10     | 10    | 1       | 9       | E     | 9124.7902                     | -2.0                               |



**Table S18.** Experimental transition frequencies ( $\nu_{\text{obs}}$ , MHz) and fit deviations ( $\nu_{\text{obs-cal}}$ , kHz) of the Isomer I of 4FAP-D<sub>2</sub>O.

| $J'$ | $K_a'$ | $K_c'$ | $J''$ | $K_a''$ | $K_c''$ | State | $\nu_{\text{obs}}/\text{MHz}$ | $\nu_{\text{obs-cal}}/\text{kHz}$ |
|------|--------|--------|-------|---------|---------|-------|-------------------------------|-----------------------------------|
| 7    | 0      | 7      | 6     | 0       | 6       | A     | 5498.7964                     | -2.6                              |
| 7    | 0      | 7      | 6     | 0       | 6       | E     | 5498.7964                     | -0.9                              |
| 7    | 1      | 7      | 6     | 1       | 6       | A     | 5364.4852                     | -6.9                              |
| 7    | 1      | 7      | 6     | 1       | 6       | E     | 5364.4852                     | -6.5                              |
| 7    | 1      | 6      | 6     | 1       | 5       | A     | 5675.1614                     | -2.3                              |
| 7    | 1      | 6      | 6     | 1       | 5       | E     | 5675.1614                     | 1.2                               |
| 7    | 2      | 6      | 6     | 2       | 5       | A     | 5522.4724                     | -1.5                              |
| 7    | 2      | 6      | 6     | 2       | 5       | E     | 5522.4854                     | -0.9                              |
| 7    | 2      | 5      | 6     | 2       | 4       | A     | 5550.0045                     | 0.1                               |
| 7    | 2      | 5      | 6     | 2       | 4       | E     | 5549.9817                     | -5.9                              |
| 8    | 0      | 8      | 7     | 0       | 7       | A     | 6274.7086                     | -1.9                              |
| 8    | 0      | 8      | 7     | 0       | 7       | E     | 6274.7086                     | -0.1                              |
| 8    | 1      | 8      | 7     | 1       | 7       | A     | 6128.5482                     | -1.2                              |
| 8    | 1      | 8      | 7     | 1       | 7       | E     | 6128.5482                     | -0.7                              |
| 8    | 1      | 7      | 7     | 1       | 6       | A     | 6483.2265                     | -3.8                              |
| 8    | 1      | 7      | 7     | 1       | 6       | E     | 6483.2265                     | 0.1                               |
| 8    | 2      | 7      | 7     | 2       | 6       | A     | 6309.7464                     | 2.5                               |
| 8    | 2      | 7      | 7     | 2       | 6       | E     | 6309.7464                     | -2.4                              |
| 8    | 2      | 6      | 7     | 2       | 5       | A     | 6350.8297                     | 0.8                               |
| 8    | 2      | 6      | 7     | 2       | 5       | E     | 6350.8129                     | -6.0                              |
| 9    | 0      | 9      | 8     | 0       | 8       | A     | 7046.9885                     | -1.9                              |
| 9    | 0      | 9      | 8     | 0       | 8       | E     | 7046.9885                     | -0.1                              |
| 9    | 1      | 9      | 8     | 1       | 8       | A     | 6891.7526                     | -1.7                              |
| 9    | 1      | 9      | 8     | 1       | 8       | E     | 6891.7526                     | -1.2                              |
| 9    | 1      | 8      | 8     | 1       | 7       | A     | 7290.1555                     | -0.8                              |
| 9    | 1      | 8      | 8     | 1       | 7       | E     | 7290.1555                     | 3.5                               |
| 9    | 2      | 8      | 8     | 2       | 7       | A     | 7096.3535                     | 0.1                               |
| 9    | 2      | 8      | 8     | 2       | 7       | E     | 7096.3535                     | -1.3                              |
| 9    | 2      | 7      | 8     | 2       | 6       | A     | 7154.6209                     | 3.6                               |
| 9    | 2      | 7      | 8     | 2       | 6       | E     | 7154.6077                     | -2.4                              |
| 10   | 0      | 10     | 9     | 0       | 9       | A     | 7815.3887                     | -0.4                              |
| 10   | 0      | 10     | 9     | 0       | 9       | E     | 7815.3887                     | 1.5                               |
| 10   | 1      | 10     | 9     | 1       | 9       | A     | 7654.0383                     | -2.4                              |
| 10   | 1      | 10     | 9     | 1       | 9       | E     | 7654.0383                     | -1.8                              |
| 10   | 1      | 9      | 9     | 1       | 8       | A     | 8095.7547                     | 0.8                               |
| 10   | 1      | 9      | 9     | 1       | 8       | E     | 8095.7471                     | -2.1                              |
| 10   | 2      | 9      | 9     | 2       | 8       | A     | 7882.2231                     | 1.7                               |
| 10   | 2      | 9      | 9     | 2       | 8       | E     | 7882.2231                     | 2.2                               |
| 10   | 2      | 8      | 9     | 2       | 7       | A     | 7961.5333                     | -0.5                              |
| 10   | 2      | 8      | 9     | 2       | 7       | E     | 7961.5228                     | -4.8                              |
| 11   | 0      | 11     | 10    | 0       | 10      | A     | 8579.7684                     | -0.9                              |

---

|    |   |    |    |   |    |   |            |      |
|----|---|----|----|---|----|---|------------|------|
| 11 | 0 | 11 | 10 | 0 | 10 | E | 8579.7684  | 1.0  |
| 11 | 1 | 11 | 10 | 1 | 10 | A | 8415.3542  | -0.9 |
| 11 | 1 | 11 | 10 | 1 | 10 | E | 8415.3542  | -0.3 |
| 11 | 1 | 10 | 10 | 1 | 9  | A | 8899.8214  | 2.1  |
| 11 | 1 | 10 | 10 | 1 | 9  | E | 8899.8099  | -4.3 |
| 11 | 2 | 10 | 10 | 2 | 9  | A | 8667.2675  | -0.3 |
| 11 | 2 | 10 | 10 | 2 | 9  | E | 8667.2675  | 1.3  |
| 11 | 2 | 9  | 10 | 2 | 8  | A | 8771.6334  | 4.9  |
| 11 | 2 | 9  | 10 | 2 | 8  | E | 8771.6226  | -0.1 |
| 12 | 0 | 12 | 11 | 0 | 11 | A | 9340.1242  | -0.9 |
| 12 | 0 | 12 | 11 | 0 | 11 | E | 9340.1242  | 0.8  |
| 12 | 1 | 12 | 11 | 1 | 11 | A | 9175.6570  | -0.7 |
| 12 | 1 | 12 | 11 | 1 | 11 | E | 9175.6570  | -0.1 |
| 12 | 1 | 11 | 11 | 1 | 10 | A | 9702.1366  | 5.0  |
| 12 | 1 | 11 | 11 | 1 | 10 | E | 9702.1261  | 0.0  |
| 13 | 0 | 13 | 12 | 0 | 12 | A | 10096.5892 | -2.0 |
| 13 | 0 | 13 | 12 | 0 | 12 | E | 10096.5892 | -0.3 |
| 13 | 1 | 13 | 12 | 1 | 12 | A | 9934.9215  | -0.7 |
| 13 | 1 | 13 | 12 | 1 | 12 | E | 9934.9215  | -0.2 |
| 13 | 1 | 12 | 12 | 1 | 11 | A | 10502.4580 | 5.8  |
| 13 | 1 | 12 | 12 | 1 | 11 | E | 10502.4460 | -0.4 |
| 14 | 0 | 14 | 13 | 0 | 13 | A | 10849.4381 | 0.0  |
| 14 | 0 | 14 | 13 | 0 | 13 | E | 10849.4381 | 1.6  |
| 15 | 0 | 15 | 14 | 0 | 14 | A | 11599.0557 | 1.4  |
| 15 | 0 | 15 | 14 | 0 | 14 | E | 11599.0557 | 2.9  |
| 16 | 0 | 16 | 15 | 0 | 15 | A | 12345.9231 | 9.6  |
| 16 | 0 | 16 | 15 | 0 | 15 | E | 12345.9139 | 1.7  |
| 7  | 1 | 7  | 6  | 0 | 6  | A | 7916.4344  | 2.3  |
| 7  | 1 | 7  | 6  | 0 | 6  | E | 7916.4250  | 0.9  |
| 8  | 1 | 8  | 7  | 0 | 7  | A | 8546.1813  | -1.2 |
| 8  | 1 | 8  | 7  | 0 | 7  | E | 8546.1691  | -6.6 |
| 9  | 1 | 9  | 8  | 0 | 8  | A | 9163.2302  | 3.9  |
| 9  | 1 | 9  | 8  | 0 | 8  | E | 9163.2214  | 0.6  |
| 10 | 1 | 10 | 9  | 0 | 9  | A | 9770.2781  | 1.6  |
| 10 | 1 | 10 | 9  | 0 | 9  | E | 9770.2708  | -1.5 |
| 11 | 1 | 11 | 10 | 0 | 10 | A | 10370.2405 | -2.0 |
| 11 | 1 | 11 | 10 | 0 | 10 | E | 10370.2405 | 0.9  |

---

**Table S19.** Experimental transition frequencies ( $\nu_{\text{obs}}$ , MHz) and fit deviations ( $\nu_{\text{obs-calc}}$ , kHz) of the Isomer II of 4FAP-H<sub>2</sub>O.

| $J$ | $K_a'$ | $K_c'$ | $J''$ | $K_a''$ | $K_c''$ | State | $\nu_{\text{obs}}/\text{MHz}$ | $\nu_{\text{obs-calc}}/\text{kHz}$ |
|-----|--------|--------|-------|---------|---------|-------|-------------------------------|------------------------------------|
| 8   | 0      | 8      | 7     | 0       | 7       | A     | 7745.9608                     | -1.8                               |
| 8   | 0      | 8      | 7     | 0       | 7       | E     | 7745.9608                     | -1.4                               |
| 9   | 0      | 9      | 8     | 0       | 8       | A     | 8649.5044                     | 0.4                                |
| 9   | 0      | 9      | 8     | 0       | 8       | E     | 8649.5044                     | 0.8                                |
| 10  | 0      | 10     | 9     | 0       | 9       | A     | 9556.0990                     | 3.9                                |
| 10  | 0      | 10     | 9     | 0       | 9       | E     | 9556.0990                     | 4.3                                |
| 3   | 3      | 0      | 2     | 2       | 1       | A     | 7992.7803                     | -4.7                               |
| 3   | 3      | 0      | 2     | 2       | 1       | E     | 7992.8067                     | 3.3                                |
| 3   | 3      | 1      | 2     | 2       | 0       | A     | 7958.3561                     | -0.5                               |
| 3   | 3      | 1      | 2     | 2       | 0       | E     | 7958.3241                     | 1.7                                |
| 4   | 2      | 3      | 3     | 1       | 2       | A     | 6623.7213                     | -1.8                               |
| 4   | 2      | 3      | 3     | 1       | 2       | E     | 6623.7101                     | -8.2                               |
| 4   | 3      | 2      | 3     | 2       | 1       | A     | 9000.1484                     | -2.4                               |
| 4   | 3      | 2      | 3     | 2       | 1       | E     | 9000.1414                     | 2.4                                |
| 4   | 4      | 1      | 3     | 3       | 0       | A     | 10941.4972                    | -4.3                               |
| 4   | 4      | 1      | 3     | 3       | 0       | E     | 10941.2008                    | 3.2                                |
| 4   | 4      | 0      | 3     | 3       | 1       | A     | 10944.8977                    | -5.6                               |
| 4   | 4      | 0      | 3     | 3       | 1       | E     | 10945.1885                    | 3.4                                |
| 5   | 2      | 4      | 4     | 1       | 3       | A     | 7339.4563                     | -0.2                               |
| 5   | 2      | 4      | 4     | 1       | 3       | E     | 7339.4563                     | 4.5                                |
| 5   | 3      | 3      | 4     | 2       | 2       | A     | 9936.5805                     | -2.2                               |
| 5   | 3      | 3      | 4     | 2       | 2       | E     | 9936.5805                     | 7.0                                |
| 5   | 3      | 2      | 4     | 2       | 3       | A     | 10446.8840                    | 5.4                                |
| 5   | 3      | 2      | 4     | 2       | 3       | E     | 10446.8740                    | 1.8                                |
| 5   | 4      | 2      | 4     | 3       | 1       | A     | 12045.9039                    | -1.5                               |
| 5   | 4      | 2      | 4     | 3       | 1       | E     | 12045.8330                    | 1.2                                |
| 5   | 4      | 1      | 4     | 3       | 2       | A     | 12069.8944                    | -4.4                               |
| 5   | 4      | 1      | 4     | 3       | 2       | E     | 12069.9522                    | 1.8                                |
| 6   | 1      | 6      | 5     | 0       | 5       | A     | 6043.1318                     | -1.7                               |
| 6   | 1      | 6      | 5     | 0       | 5       | E     | 6043.1318                     | -0.7                               |
| 6   | 0      | 6      | 5     | 1       | 5       | A     | 5787.3999                     | 2.0                                |
| 6   | 0      | 6      | 5     | 1       | 5       | E     | 5787.3999                     | 1.7                                |
| 6   | 2      | 5      | 5     | 1       | 4       | A     | 7985.3855                     | 1.4                                |
| 6   | 2      | 5      | 5     | 1       | 4       | E     | 7985.3855                     | 6.0                                |
| 6   | 3      | 4      | 5     | 2       | 3       | A     | 10739.4476                    | 2.0                                |
| 6   | 3      | 4      | 5     | 2       | 3       | E     | 10739.4391                    | 2.4                                |
| 6   | 3      | 3      | 5     | 2       | 4       | A     | 11878.2297                    | 1.7                                |
| 6   | 3      | 3      | 5     | 2       | 4       | E     | 11878.2186                    | -3.0                               |
| 6   | 4      | 3      | 5     | 3       | 2       | A     | 13116.0986                    | -1.8                               |
| 6   | 4      | 3      | 5     | 3       | 2       | E     | 13116.0768                    | 0.7                                |
| 6   | 4      | 2      | 5     | 3       | 3       | A     | 13211.6770                    | -3.1                               |

---

|    |   |    |    |   |    |   |            |      |
|----|---|----|----|---|----|---|------------|------|
| 6  | 4 | 2  | 5  | 3 | 3  | E | 13211.6870 | 4.7  |
| 7  | 1 | 7  | 6  | 0 | 6  | A | 6891.6196  | -2.0 |
| 7  | 1 | 7  | 6  | 0 | 6  | E | 6891.6196  | -1.3 |
| 7  | 0 | 7  | 6  | 1 | 6  | A | 6759.0436  | -1.4 |
| 7  | 0 | 7  | 6  | 1 | 6  | E | 6759.0436  | -1.5 |
| 7  | 2 | 6  | 6  | 1 | 5  | A | 8599.8724  | -0.6 |
| 7  | 2 | 6  | 6  | 1 | 5  | E | 8599.8724  | 3.7  |
| 7  | 3 | 5  | 6  | 2 | 4  | A | 11409.9552 | -2.3 |
| 7  | 3 | 5  | 6  | 2 | 4  | E | 11409.9443 | -4.3 |
| 7  | 3 | 4  | 6  | 2 | 5  | A | 13541.0507 | -9.9 |
| 7  | 3 | 4  | 6  | 2 | 5  | E | 13541.0602 | 5.1  |
| 7  | 4 | 4  | 6  | 3 | 3  | A | 14114.6110 | 0.5  |
| 7  | 4 | 4  | 6  | 3 | 3  | E | 14114.5945 | -0.9 |
| 7  | 4 | 3  | 6  | 3 | 4  | A | 14394.7176 | 5.1  |
| 7  | 4 | 3  | 6  | 3 | 4  | E | 14394.7040 | -1.6 |
| 8  | 1 | 8  | 7  | 0 | 7  | A | 7767.3334  | -0.5 |
| 8  | 1 | 8  | 7  | 0 | 7  | E | 7767.3334  | 0.1  |
| 8  | 0 | 8  | 7  | 1 | 7  | A | 7701.7111  | 0.3  |
| 8  | 0 | 8  | 7  | 1 | 7  | E | 7701.7111  | 0.4  |
| 8  | 2 | 7  | 7  | 1 | 6  | A | 9230.8354  | -2.2 |
| 8  | 2 | 7  | 7  | 1 | 6  | E | 9230.8279  | -6.0 |
| 8  | 3 | 6  | 7  | 2 | 5  | A | 11969.7600 | 1.1  |
| 8  | 3 | 6  | 7  | 2 | 5  | E | 11969.7508 | 0.7  |
| 8  | 4 | 5  | 7  | 3 | 4  | A | 14995.5521 | -2.3 |
| 8  | 4 | 5  | 7  | 3 | 4  | E | 14995.5450 | 3.9  |
| 9  | 1 | 9  | 8  | 0 | 8  | A | 8659.5479  | -1.1 |
| 9  | 1 | 9  | 8  | 0 | 8  | E | 8659.5479  | -0.6 |
| 9  | 0 | 9  | 8  | 1 | 8  | A | 8628.1339  | 1.2  |
| 9  | 0 | 9  | 8  | 1 | 8  | E | 8628.1339  | 1.4  |
| 9  | 2 | 8  | 8  | 1 | 7  | A | 9917.1573  | -2.9 |
| 9  | 2 | 8  | 8  | 1 | 7  | E | 9917.1573  | 0.1  |
| 9  | 3 | 7  | 8  | 2 | 6  | A | 12452.5144 | 4.0  |
| 9  | 3 | 7  | 8  | 2 | 6  | E | 12452.4949 | -6.8 |
| 10 | 1 | 10 | 9  | 0 | 9  | A | 9560.7183  | -0.7 |
| 10 | 1 | 10 | 9  | 0 | 9  | E | 9560.7183  | -0.3 |
| 10 | 0 | 10 | 9  | 1 | 9  | A | 9546.0485  | -1.6 |
| 10 | 0 | 10 | 9  | 1 | 9  | E | 9546.0485  | -1.3 |
| 10 | 2 | 9  | 9  | 1 | 8  | A | 10672.1745 | -0.9 |
| 10 | 2 | 9  | 9  | 1 | 8  | E | 10672.1745 | 1.5  |
| 11 | 1 | 11 | 10 | 0 | 10 | A | 10466.4474 | -0.8 |
| 11 | 1 | 11 | 10 | 0 | 10 | E | 10466.4474 | -0.4 |
| 11 | 0 | 11 | 10 | 1 | 10 | A | 10459.7319 | 1.3  |
| 11 | 0 | 11 | 10 | 1 | 10 | E | 10459.7319 | 1.6  |
| 11 | 2 | 10 | 10 | 1 | 9  | A | 11486.2573 | -1.6 |

---

|    |   |    |    |   |    |   |            |      |
|----|---|----|----|---|----|---|------------|------|
| 11 | 2 | 10 | 10 | 1 | 9  | E | 11486.2573 | 0.3  |
| 12 | 1 | 12 | 11 | 0 | 11 | A | 11374.4099 | 0.2  |
| 12 | 1 | 12 | 11 | 0 | 11 | E | 11374.4099 | 0.5  |
| 12 | 0 | 12 | 11 | 1 | 11 | A | 11371.3811 | 0.1  |
| 12 | 0 | 12 | 11 | 1 | 11 | E | 11371.3811 | 0.5  |
| 12 | 2 | 11 | 11 | 1 | 10 | A | 12341.3331 | -0.3 |
| 12 | 2 | 11 | 11 | 1 | 10 | E | 12341.3331 | 1.2  |
| 13 | 1 | 13 | 12 | 0 | 12 | A | 12283.4365 | -1.4 |
| 13 | 1 | 13 | 12 | 0 | 12 | E | 12283.4365 | -1.1 |
| 13 | 0 | 13 | 12 | 1 | 12 | A | 12282.0890 | -0.6 |
| 13 | 0 | 13 | 12 | 1 | 12 | E | 12282.0890 | -0.2 |
| 13 | 2 | 12 | 12 | 1 | 11 | A | 13221.3833 | 4.2  |
| 13 | 2 | 12 | 12 | 1 | 11 | E | 13221.3833 | 5.5  |
| 14 | 1 | 14 | 13 | 0 | 13 | A | 13192.9649 | -3.2 |
| 14 | 1 | 14 | 13 | 0 | 13 | E | 13192.9696 | 1.7  |
| 14 | 0 | 14 | 13 | 1 | 13 | A | 13192.3794 | 5.1  |
| 14 | 0 | 14 | 13 | 1 | 13 | E | 13192.3700 | -3.8 |
| 14 | 2 | 13 | 13 | 1 | 12 | A | 14115.4749 | -1.4 |
| 14 | 2 | 13 | 13 | 1 | 12 | E | 14115.4749 | -0.2 |
| 15 | 1 | 15 | 14 | 0 | 14 | A | 14102.7320 | -0.6 |
| 15 | 1 | 15 | 14 | 0 | 14 | E | 14102.7320 | -0.7 |
| 15 | 0 | 15 | 14 | 1 | 14 | A | 14102.4740 | 0.6  |
| 15 | 0 | 15 | 14 | 1 | 14 | E | 14102.4740 | 1.3  |
| 15 | 2 | 14 | 14 | 1 | 13 | A | 15017.1008 | -2.5 |
| 15 | 2 | 14 | 14 | 1 | 13 | E | 15017.1008 | -1.3 |

**Table S20.** Experimental transition frequencies ( $\nu_{\text{obs}}$ , MHz) and fit deviations ( $\nu_{\text{obs-calc}}$ , kHz) of the Isomer II of 4FAP-H<sub>2</sub><sup>18</sup>O.

| $J'$ | $K_a'$ | $K_c'$ | $J''$ | $K_a''$ | $K_c''$ | State | $\nu_{\text{obs}}/\text{MHz}$ | $\nu_{\text{obs-calc}}/\text{kHz}$ |
|------|--------|--------|-------|---------|---------|-------|-------------------------------|------------------------------------|
| 6    | 1      | 6      | 5     | 0       | 5       | A     | 5868.3006                     | 1.8                                |
| 6    | 1      | 6      | 5     | 0       | 5       | E     | 5868.3006                     | 2.7                                |
| 6    | 0      | 6      | 5     | 1       | 5       | A     | 5643.8162                     | -2.0                               |
| 6    | 0      | 6      | 5     | 1       | 5       | E     | 5643.8162                     | -2.2                               |
| 7    | 1      | 7      | 6     | 0       | 6       | A     | 6698.2908                     | 1.9                                |
| 7    | 1      | 7      | 6     | 0       | 6       | E     | 6698.2908                     | 2.6                                |
| 7    | 0      | 7      | 6     | 1       | 6       | A     | 6584.4163                     | -1.1                               |
| 7    | 0      | 7      | 6     | 1       | 6       | E     | 6584.4163                     | -1.1                               |
| 7    | 2      | 6      | 6     | 1       | 5       | A     | 8307.4272                     | -4.6                               |
| 7    | 2      | 6      | 6     | 1       | 5       | E     | 8307.4272                     | -0.7                               |
| 8    | 1      | 8      | 7     | 0       | 7       | A     | 7553.6028                     | 2.5                                |
| 8    | 1      | 8      | 7     | 0       | 7       | E     | 7553.6028                     | 3.0                                |
| 8    | 0      | 8      | 7     | 1       | 7       | A     | 7498.4381                     | 0.3                                |
| 8    | 0      | 8      | 7     | 1       | 7       | E     | 7498.4381                     | 0.5                                |
| 8    | 2      | 7      | 7     | 1       | 6       | A     | 8929.3356                     | -1.9                               |

|    |   |    |    |   |    |   |            |      |
|----|---|----|----|---|----|---|------------|------|
| 8  | 2 | 7  | 7  | 1 | 6  | E | 8929.3356  | 1.5  |
| 9  | 1 | 9  | 8  | 0 | 8  | A | 8423.7875  | 3.2  |
| 9  | 1 | 9  | 8  | 0 | 8  | E | 8423.7875  | 3.7  |
| 9  | 0 | 9  | 8  | 1 | 8  | A | 8397.9346  | 0.6  |
| 9  | 0 | 9  | 8  | 1 | 8  | E | 8397.9346  | 0.8  |
| 9  | 2 | 8  | 8  | 1 | 7  | A | 9609.5519  | 0.5  |
| 9  | 2 | 8  | 8  | 1 | 7  | E | 9609.5519  | 3.3  |
| 10 | 1 | 10 | 9  | 0 | 9  | A | 9301.8275  | 2.4  |
| 10 | 1 | 10 | 9  | 0 | 9  | E | 9301.8275  | 2.8  |
| 10 | 0 | 10 | 9  | 1 | 9  | A | 9290.0093  | 0.7  |
| 10 | 0 | 10 | 9  | 1 | 9  | E | 9290.0093  | 1.0  |
| 11 | 1 | 11 | 10 | 0 | 10 | A | 10183.7717 | 0.2  |
| 11 | 1 | 11 | 10 | 0 | 10 | E | 10183.7717 | 0.5  |
| 11 | 0 | 11 | 10 | 1 | 10 | A | 10178.4745 | 1.0  |
| 11 | 0 | 11 | 10 | 1 | 10 | E | 10178.4745 | 1.3  |
| 12 | 1 | 12 | 11 | 0 | 11 | A | 11067.5869 | -1.8 |
| 12 | 1 | 12 | 11 | 0 | 11 | E | 11067.5869 | -1.5 |
| 12 | 0 | 12 | 11 | 1 | 11 | A | 11065.2498 | -0.1 |
| 12 | 0 | 12 | 11 | 1 | 11 | E | 11065.2498 | 0.2  |
| 13 | 1 | 13 | 12 | 0 | 12 | A | 11952.2797 | -2.1 |
| 13 | 1 | 13 | 12 | 0 | 12 | E | 11952.2797 | -1.8 |
| 13 | 0 | 13 | 12 | 1 | 12 | A | 11951.2597 | -2.7 |
| 13 | 0 | 13 | 12 | 1 | 12 | E | 11951.2597 | -2.3 |
| 14 | 1 | 14 | 13 | 0 | 13 | A | 12837.3780 | -1.3 |
| 14 | 1 | 14 | 13 | 0 | 13 | E | 12837.3780 | -1.2 |
| 14 | 0 | 14 | 13 | 1 | 13 | A | 12836.9376 | -2.1 |
| 14 | 0 | 14 | 13 | 1 | 13 | E | 12836.9376 | -1.6 |

**Table S21.** Experimental transition frequencies ( $\nu_{\text{obs}}$ , MHz) and fit deviations ( $\nu_{\text{obs-calc}}$ , kHz) of the Isomer II of 4FAP-HOD.

| $J'$ | $K_a'$ | $K_c'$ | $J''$ | $K_a''$ | $K_c''$ | State | $\nu_{\text{obs}}/\text{MHz}$ | $\nu_{\text{obs-calc}}/\text{kHz}$ |
|------|--------|--------|-------|---------|---------|-------|-------------------------------|------------------------------------|
| 6    | 1      | 6      | 5     | 0       | 5       | A     | 5918.5375                     | -0.9                               |
| 6    | 1      | 6      | 5     | 0       | 5       | E     | 5918.5375                     | 0.0                                |
| 6    | 0      | 6      | 5     | 1       | 5       | A     | 5680.5805                     | 1.1                                |
| 6    | 0      | 6      | 5     | 1       | 5       | E     | 5680.5805                     | 0.9                                |
| 7    | 1      | 7      | 6     | 0       | 6       | A     | 6752.7006                     | 1.7                                |
| 7    | 1      | 7      | 6     | 0       | 6       | E     | 6752.7006                     | 2.3                                |
| 7    | 0      | 7      | 6     | 1       | 6       | A     | 6630.6855                     | -0.8                               |
| 7    | 0      | 7      | 6     | 1       | 6       | E     | 6630.6855                     | -0.9                               |
| 8    | 1      | 8      | 7     | 0       | 7       | A     | 7612.9537                     | -0.9                               |
| 8    | 1      | 8      | 7     | 0       | 7       | E     | 7612.9537                     | -0.3                               |
| 8    | 0      | 8      | 7     | 1       | 7       | A     | 7553.2154                     | 0.2                                |
| 8    | 0      | 8      | 7     | 1       | 7       | E     | 7553.2154                     | 0.3                                |
| 9    | 1      | 9      | 8     | 0       | 8       | A     | 8488.7769                     | 0.4                                |

|    |   |    |    |   |    |   |            |      |
|----|---|----|----|---|----|---|------------|------|
| 9  | 1 | 9  | 8  | 0 | 8  | E | 8488.7769  | 0.8  |
| 9  | 0 | 9  | 8  | 1 | 8  | A | 8460.4834  | -0.9 |
| 9  | 0 | 9  | 8  | 1 | 8  | E | 8460.4834  | -0.7 |
| 10 | 1 | 10 | 9  | 0 | 9  | A | 9372.9289  | -2.0 |
| 10 | 1 | 10 | 9  | 0 | 9  | E | 9372.9289  | -1.6 |
| 10 | 0 | 10 | 9  | 1 | 9  | A | 9359.8603  | -1.4 |
| 10 | 0 | 10 | 9  | 1 | 9  | E | 9359.8603  | -1.1 |
| 11 | 1 | 11 | 10 | 0 | 10 | A | 10261.2751 | -1.2 |
| 11 | 1 | 11 | 10 | 0 | 10 | E | 10261.2751 | -0.8 |
| 11 | 0 | 11 | 10 | 1 | 10 | A | 10255.3591 | 4.1  |
| 11 | 0 | 11 | 10 | 1 | 10 | E | 10255.3591 | 4.4  |
| 12 | 1 | 12 | 11 | 0 | 11 | A | 11151.6503 | -0.7 |
| 12 | 1 | 12 | 11 | 0 | 11 | E | 11151.6503 | -0.4 |
| 12 | 0 | 12 | 11 | 1 | 11 | A | 11149.0080 | -1.6 |
| 12 | 0 | 12 | 11 | 1 | 11 | E | 11149.0080 | -1.3 |
| 13 | 1 | 13 | 12 | 0 | 12 | A | 12042.9840 | -1.4 |
| 13 | 1 | 13 | 12 | 0 | 12 | E | 12042.9840 | -1.1 |
| 13 | 0 | 13 | 12 | 1 | 12 | A | 12041.8208 | -1.2 |
| 13 | 0 | 13 | 12 | 1 | 12 | E | 12041.8208 | -0.8 |
| 14 | 1 | 14 | 13 | 0 | 13 | A | 12934.7677 | 0.7  |
| 14 | 1 | 14 | 13 | 0 | 13 | E | 12934.7677 | 0.9  |
| 14 | 0 | 14 | 13 | 1 | 13 | A | 12934.2619 | 1.9  |
| 14 | 0 | 14 | 13 | 1 | 13 | E | 12934.2619 | 2.4  |

**Table S22.** Experimental transition frequencies ( $\nu_{\text{obs}}$ , MHz) and fit deviations ( $\nu_{\text{obs-calc}}$ , kHz) of the Isomer II of 4FAP-DOH.

| $J'$ | $K_a'$ | $K_c'$ | $J''$ | $K_a''$ | $K_c''$ | State | $\nu_{\text{obs}}/\text{MHz}$ | $\nu_{\text{obs-calc}}/\text{kHz}$ |
|------|--------|--------|-------|---------|---------|-------|-------------------------------|------------------------------------|
| 6    | 1      | 6      | 5     | 0       | 5       | A     | 5984.8251                     | 0.0                                |
| 6    | 1      | 6      | 5     | 0       | 5       | E     | 5984.8251                     | 1.0                                |
| 6    | 0      | 6      | 5     | 1       | 5       | A     | 5726.4561                     | 0.9                                |
| 6    | 0      | 6      | 5     | 1       | 5       | E     | 5726.4561                     | 0.6                                |
| 7    | 1      | 7      | 6     | 0       | 6       | A     | 6823.8493                     | 0.2                                |
| 7    | 1      | 7      | 6     | 0       | 6       | E     | 6823.8493                     | 0.9                                |
| 7    | 0      | 7      | 6     | 1       | 6       | A     | 6689.3310                     | -0.3                               |
| 7    | 0      | 7      | 6     | 1       | 6       | E     | 6689.3310                     | -0.3                               |
| 8    | 1      | 8      | 7     | 0       | 7       | A     | 7690.0535                     | -0.9                               |
| 8    | 1      | 8      | 7     | 0       | 7       | E     | 7690.0535                     | -0.4                               |
| 8    | 0      | 8      | 7     | 1       | 7       | A     | 7623.1852                     | -1.4                               |
| 8    | 0      | 8      | 7     | 1       | 7       | E     | 7623.1852                     | -1.3                               |
| 9    | 1      | 9      | 8     | 0       | 8       | A     | 8572.8404                     | -0.8                               |
| 9    | 1      | 9      | 8     | 0       | 8       | E     | 8572.8404                     | -0.4                               |
| 9    | 0      | 9      | 8     | 1       | 8       | A     | 8540.6936                     | -0.2                               |
| 9    | 0      | 9      | 8     | 1       | 8       | E     | 8540.6936                     | 0.0                                |
| 10   | 1      | 10     | 9     | 0       | 9       | A     | 9464.6712                     | -2.7                               |

|    |   |    |    |   |    |   |            |      |
|----|---|----|----|---|----|---|------------|------|
| 10 | 1 | 10 | 9  | 0 | 9  | E | 9464.6712  | -2.3 |
| 10 | 0 | 10 | 9  | 1 | 9  | A | 9449.6001  | -0.4 |
| 10 | 0 | 10 | 9  | 1 | 9  | E | 9449.6001  | -0.1 |
| 11 | 1 | 11 | 10 | 0 | 10 | A | 10361.1356 | 1.7  |
| 11 | 1 | 11 | 10 | 0 | 10 | E | 10361.1356 | 2.1  |
| 11 | 0 | 11 | 10 | 1 | 10 | A | 10354.2053 | 3.0  |
| 11 | 0 | 11 | 10 | 1 | 10 | E | 10354.2053 | 3.3  |
| 12 | 1 | 12 | 11 | 0 | 11 | A | 11259.8684 | -1.2 |
| 12 | 1 | 12 | 11 | 0 | 11 | E | 11259.8684 | -0.9 |
| 12 | 0 | 12 | 11 | 1 | 11 | A | 11256.7326 | 1.2  |
| 12 | 0 | 12 | 11 | 1 | 11 | E | 11256.7326 | 1.6  |
| 13 | 1 | 13 | 12 | 0 | 12 | A | 12159.6967 | -0.4 |
| 13 | 1 | 13 | 12 | 0 | 12 | E | 12159.6967 | -0.1 |
| 13 | 0 | 13 | 12 | 1 | 12 | A | 12158.2929 | -1.4 |
| 13 | 0 | 13 | 12 | 1 | 12 | E | 12158.2929 | -1.0 |

**Table S23.** Experimental transition frequencies ( $\nu_{\text{obs}}$ , MHz) and fit deviations ( $\nu_{\text{obs-calc}}$ , kHz) of the Isomer II of 4FAP-D<sub>2</sub>O.

| $J'$ | $K_a'$ | $K_c'$ | $J''$ | $K_a''$ | $K_c''$ | State | $\nu_{\text{obs}}/\text{MHz}$ | $\nu_{\text{obs-calc}}/\text{kHz}$ |
|------|--------|--------|-------|---------|---------|-------|-------------------------------|------------------------------------|
| 6    | 1      | 6      | 5     | 0       | 5       | A     | 5864.0282                     | -3.3                               |
| 6    | 1      | 6      | 5     | 0       | 5       | E     | 5864.0282                     | -2.4                               |
| 6    | 0      | 6      | 5     | 1       | 5       | A     | 5621.9033                     | -1.1                               |
| 6    | 0      | 6      | 5     | 1       | 5       | E     | 5621.9033                     | -1.3                               |
| 7    | 1      | 7      | 6     | 0       | 6       | A     | 6688.8948                     | -0.3                               |
| 7    | 1      | 7      | 6     | 0       | 6       | E     | 6688.8948                     | 0.4                                |
| 7    | 0      | 7      | 6     | 1       | 6       | A     | 6564.0331                     | -0.8                               |
| 7    | 0      | 7      | 6     | 1       | 6       | E     | 6564.0331                     | -0.9                               |
| 8    | 1      | 8      | 7     | 0       | 7       | A     | 7539.9088                     | 1.8                                |
| 8    | 1      | 8      | 7     | 0       | 7       | E     | 7539.9088                     | 2.4                                |
| 8    | 0      | 8      | 7     | 1       | 7       | A     | 7478.4270                     | 1.5                                |
| 8    | 0      | 8      | 7     | 1       | 7       | E     | 7478.4270                     | 1.6                                |
| 9    | 1      | 9      | 8     | 0       | 8       | A     | 8406.6501                     | 2.9                                |
| 9    | 1      | 9      | 8     | 0       | 8       | E     | 8406.6501                     | 3.3                                |
| 9    | 0      | 9      | 8     | 1       | 8       | A     | 8377.3661                     | 0.1                                |
| 9    | 0      | 9      | 8     | 1       | 8       | E     | 8377.3661                     | 0.3                                |
| 10   | 1      | 10     | 9     | 0       | 9       | A     | 9281.8677                     | 1.4                                |
| 10   | 1      | 10     | 9     | 0       | 9       | E     | 9281.8677                     | 1.8                                |
| 10   | 0      | 10     | 9     | 1       | 9       | A     | 9268.2646                     | 0.1                                |
| 10   | 0      | 10     | 9     | 1       | 9       | E     | 9268.2646                     | 0.4                                |
| 11   | 1      | 11     | 10    | 0       | 10      | A     | 10161.3775                    | 0.7                                |
| 11   | 1      | 11     | 10    | 0       | 10      | E     | 10161.3775                    | 1.0                                |
| 11   | 0      | 11     | 10    | 1       | 10      | A     | 10155.1787                    | -1.2                               |
| 11   | 0      | 11     | 10    | 1       | 10      | E     | 10155.1787                    | -0.9                               |
| 12   | 1      | 12     | 11    | 0       | 11      | A     | 11042.9763                    | -1.2                               |



|    |   |    |    |   |    |   |            |      |
|----|---|----|----|---|----|---|------------|------|
| 12 | 1 | 12 | 11 | 0 | 11 | E | 11042.9763 | -0.9 |
| 12 | 0 | 12 | 11 | 1 | 11 | A | 11040.1967 | -1.1 |
| 12 | 0 | 12 | 11 | 1 | 11 | E | 11040.1967 | -0.7 |
| 13 | 1 | 13 | 12 | 0 | 12 | A | 11925.5718 | 0.1  |
| 13 | 1 | 13 | 12 | 0 | 12 | E | 11925.5718 | 0.4  |
| 13 | 0 | 13 | 12 | 1 | 12 | A | 11924.3399 | -0.7 |
| 13 | 0 | 13 | 12 | 1 | 12 | E | 11924.3399 | -0.3 |
| 14 | 1 | 14 | 13 | 0 | 13 | A | 12808.6305 | -0.8 |
| 14 | 1 | 14 | 13 | 0 | 13 | E | 12808.6305 | -0.6 |
| 14 | 0 | 14 | 13 | 1 | 13 | A | 12808.0911 | -0.8 |
| 14 | 0 | 14 | 13 | 1 | 13 | E | 12808.0911 | -0.3 |

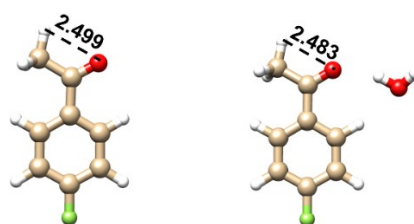

**Fig. S2.** The structural comparison of 4FAP and isomer II of 4FAP-H<sub>2</sub>O in the distance (Å) between the H atoms of -CH<sub>3</sub> and the O atoms of -C=O.

**Table S24.** Transition frequencies and intensities of isomer I and isomer II of the 4FAP-H<sub>2</sub>O complex for the population ratio.

|                                    | Isomer I   |           | Isomer II  |           |
|------------------------------------|------------|-----------|------------|-----------|
|                                    | Frequency  | Intensity | Frequency  | Intensity |
| 6 <sub>16</sub> ←5 <sub>05</sub>   | 7447.3343  | 0.0265    | 6043.1324  | 0.0157    |
| 7 <sub>17</sub> ←6 <sub>06</sub>   | 8113.7691  | 0.0179    | 6891.6204  | 0.0114    |
| 8 <sub>18</sub> ←7 <sub>07</sub>   | 8764.4813  | 0.0103    | 7767.33209 | 0.0103    |
| 10 <sub>110</sub> ←9 <sub>09</sub> | 10030.0104 | 0.0071    | 9560.7178  | 0.0062    |

**Table S25.** The  $r_s$  and  $r_e$  coordinates of the oxygen atom of water in 4FAP-H<sub>2</sub>O.

|           | Atom | $a/\text{Å}$            |       | $b/\text{Å}$ |       | $c/\text{Å}$   |         |
|-----------|------|-------------------------|-------|--------------|-------|----------------|---------|
|           |      | $r_s$                   | $r_e$ | $r_s$        | $r_e$ | $r_s$          | $r_e$   |
| Isomer I  | O18  | ±2.8638(5) <sup>a</sup> | 2.802 | ±2.7105(6)   | 2.729 | 0 <sup>b</sup> | 0.113   |
| Isomer II | O18  | 5.0465(3)               | 5.049 | 0.395(4)     | 0.379 | 0.06(2)        | -0.0491 |

<sup>a</sup> Errors in parenthesis are given in units of the last digit.

<sup>b</sup> Imaginary values, fixed at zero.

**Table S26.** Theoretical, experimental and semi-experimental rotational constants of H<sub>2</sub><sup>18</sup>O, DOH (with D participating in the HB), HOD, and D<sub>2</sub>O isotopologues of isomers I of the 4FAP-H<sub>2</sub>O.

|                                |       | $B_e^{\text{theo}}$ | $B_0^{\text{theo}}$ | $\Delta B_{\text{vib}}$ | $B_0^{\text{exp}}$        | $B_e^{\text{SE}}$ |
|--------------------------------|-------|---------------------|---------------------|-------------------------|---------------------------|-------------------|
| Normal                         | A/MHz | 3432.542            | 3439.695            | -7.153                  | 3423.8204(4) <sup>a</sup> | 3416.6674(4)      |
|                                | B/MHz | 432.584             | 427.517             | 5.067                   | 433.74560(5)              | 438.812600(5)     |
|                                | C/MHz | 385.761             | 381.795             | 3.966                   | 386.30681(3)              | 390.27281(3)      |
| H <sub>2</sub> <sup>18</sup> O | A/MHz | 3426.133            | 3453.576            | -27.443                 | 3416.8482(2)              | 3389.4052(2)      |
|                                | B/MHz | 414.671             | 410.068             | 4.603                   | 415.75543(2)              | 420.35843(2)      |
|                                | C/MHz | 371.379             | 367.933             | 3.446                   | 371.89280(1)              | 375.3388(1)       |
| HOD                            | A/MHz | 3403.385            | 3433.798            | -30.413                 | 3398.33(2)                | 3367.92(2)        |
|                                | B/MHz | 421.296             | 416.426             | 4.870                   | 422.53377(8)              | 420.35843(2)      |
|                                | C/MHz | 376.444             | 372.849             | 3.595                   | 377.10998(5)              | 375.3388(1)       |
| DOH                            | A/MHz | 3419.975            | 3450.777            | -30.802                 | 3411.030(9)               | 3380.228(9)       |
|                                | B/MHz | 426.293             | 422.148             | 4.145                   | 427.7837(1)               | 431.9287(1)       |
|                                | C/MHz | 380.598             | 377.681             | 2.917                   | 381.4084(1)               | 384.3254(1)       |
| D <sub>2</sub> O               | A/MHz | 3432.542            | 3439.694            | -7.152                  | 3386.049(1)               | 3378.897(1)       |
|                                | B/MHz | 432.584             | 427.517             | 5.067                   | 416.96138(5)              | 422.02838(5)      |
|                                | C/MHz | 385.761             | 381.795             | 3.966                   | 372.51670(3)              | 376.4827(3)       |

<sup>a</sup> Values of centrifugal distortion constants were fixed at those of the parent species.

**Table S27.** Theoretical, experimental and semi-experimental rotational constants of H<sub>2</sub><sup>18</sup>O, DOH (with D participating in the HB), HOD, and D<sub>2</sub>O isotopologues of isomers II of the 4FAP-H<sub>2</sub>O.

|                                |       | $B_e^{\text{theo}}$ | $B_0^{\text{theo}}$ | $\Delta B_{\text{vib}}$ | $B_0^{\text{exp}}$        | $B_e^{\text{SE}}$ |
|--------------------------------|-------|---------------------|---------------------|-------------------------|---------------------------|-------------------|
| Normal                         | A/MHz | 1481.942            | 1460.179            | 21.763                  | 1483.5073(5) <sup>a</sup> | 1505.2703(5)      |
|                                | B/MHz | 655.023             | 646.366             | 8.657                   | 652.7972(4)               | 661.4542(4)       |
|                                | C/MHz | 456.402             | 450.180             | 6.222                   | 455.0442(6)               | 461.2662(6)       |
| H <sub>2</sub> <sup>18</sup> O | A/MHz | 1422.587            | 1403.450            | 19.137                  | 1425.0036(5)              | 1444.1406(5)      |
|                                | B/MHz | 641.637             | 631.644             | 9.993                   | 638.9646(6)               | 648.9576(6)       |
|                                | C/MHz | 444.255             | 437.603             | 6.652                   | 442.77824(5)              | 461.2662(6)       |
| HOD                            | A/MHz | 1440.164            | 1419.317            | 20.847                  | 1444.69(2)                | 1465.537(2)       |
|                                | B/MHz | 644.435             | 633.764             | 10.671                  | 641.897(5)                | 652.568(5)        |
|                                | C/MHz | 447.393             | 440.154             | 7.239                   | 446.14194(5)              | 453.38094(5)      |
| DOH                            | A/MHz | 1468.448            | 1449.610            | 18.838                  | 1472.49(2)                | 1491.328(2)       |
|                                | B/MHz | 647.577             | 637.257             | 10.320                  | 645.481(5)                | 655.801(5)        |
|                                | C/MHz | 451.508             | 444.659             | 6.849                   | 450.45796(5)              | 457.30696(5)      |
| D <sub>2</sub> O               | A/MHz | 1428.745            | 1409.118            | 19.627                  | 1435.580(2)               | 1455.207(2)       |
|                                | B/MHz | 637.127             | 627.636             | 9.491                   | 634.667(5)                | 644.158(5)        |
|                                | C/MHz | 442.768             | 436.214             | 6.554                   | 441.7902(4)               | 448.3442(4)       |

<sup>a</sup> Values of centrifugal distortion constants were fixed at those of the parent species.
